# Supplementary material for: Transcriptome-Wide Identification and Functional Characterization of CIPK Gene Family Members in Actinidia valvata under Salt Stress
Source: MDPI journal article supplement (doi:10.3390/ijms24010805), 2023-01-02
Supplement: s1 [file s1]

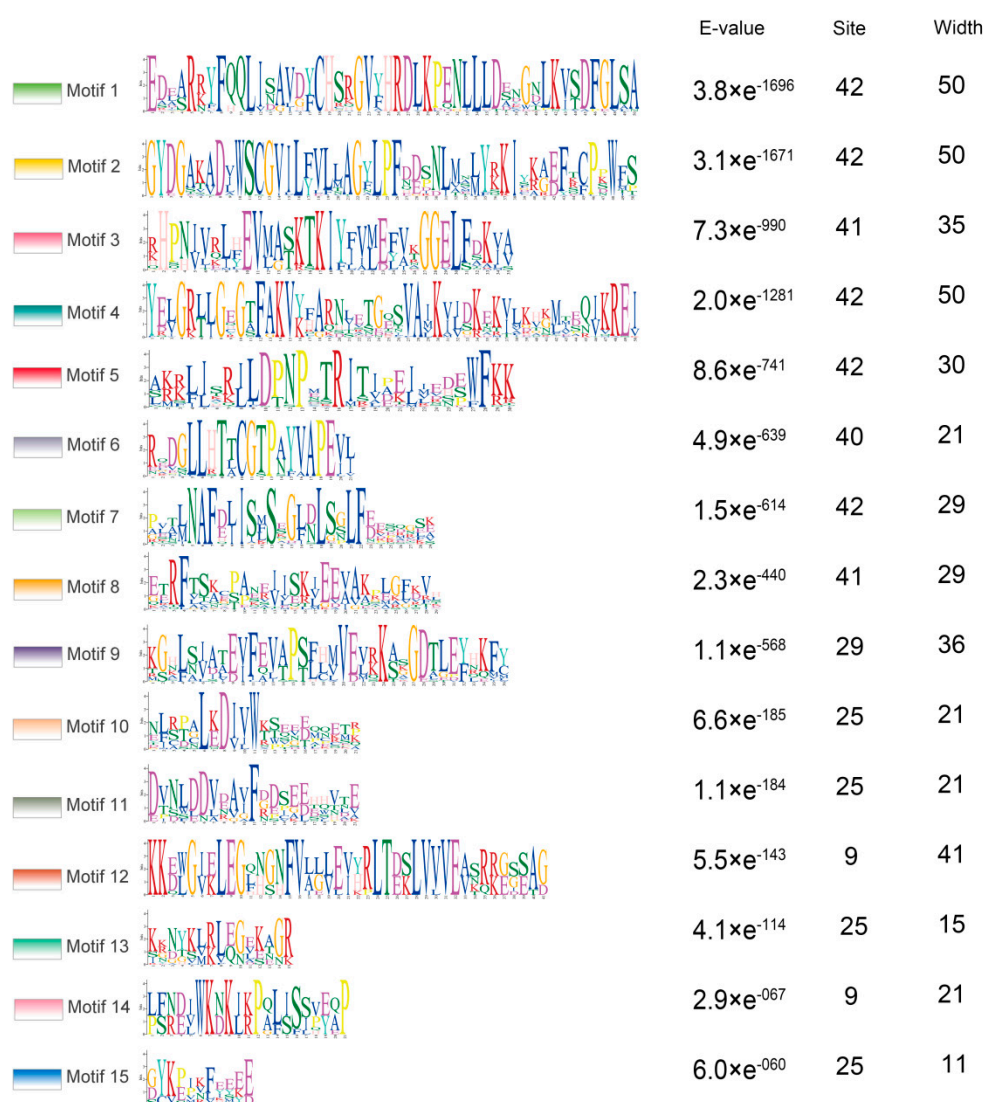

Figure S1. The conserved motif logos of amino acid sequences from AvCIPK proteins. A total of 15 logos were identified in kiwifruit CIPKs. The height of each stack indicates the conservation of the sequence at the position of the marker, and the height of each letter in each stack indicates the relative frequency of the corresponding amino acid.

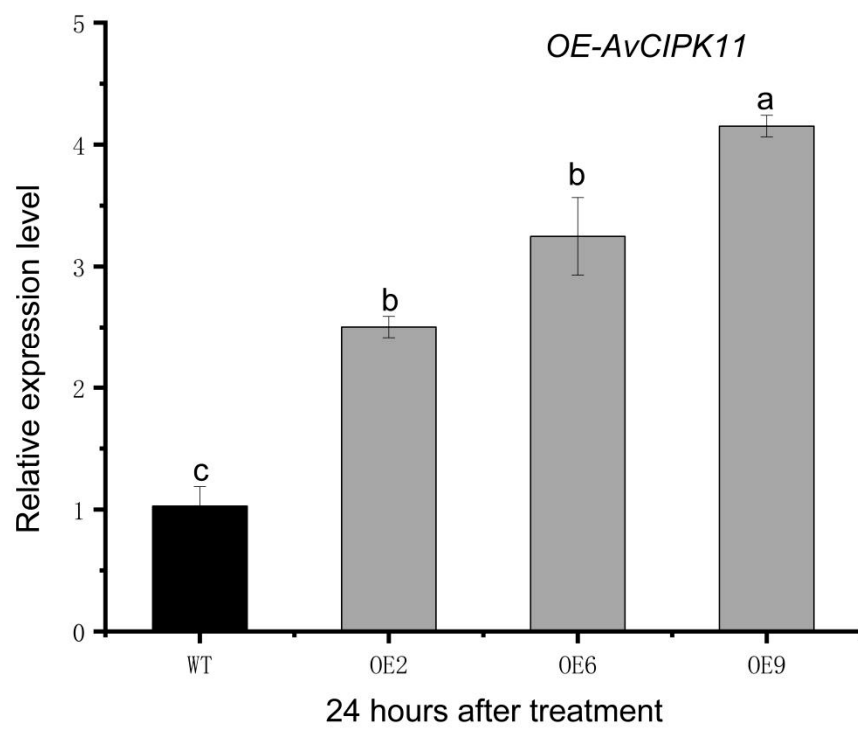

Figure S2. The expression analysis of OE-AvCIPK11 in transgenic kiwifruit plants.
