# Supplementary material for: Transcriptome-Wide Identification and Functional Characterization of CIPK Gene Family Members in Actinidia valvata under Salt Stress
Source: Int J Mol Sci. 2023 Jan 2;24(1):805. doi: 10.3390/ijms24010805 (PMC9821023; doi:10.3390/ijms24010805)
Supplement: Supplementary file 1 [file ijms-24-00805-s001.zip › supplymentary tables.xlsx]

## Sheet: TableS1
The physical and chemical properties of the predicted AvCIPK proteins
Gene ID	Gene name	Number of amino acids	Molecular weight	Theoretical pI	Instability index	Aliphatic index	Grand average of hydropathicity (GRAVY)
R_transcript_100278	AvCIPK1	412	47120.3	6.85	36.41	83.96	-0.408
R_transcript_12876	AvCIPK2	476	53961.2	8.88	39.83	93.61	-0.375
R_transcript_13797	AvCIPK3	436	48735.1	8.86	40.11	85.18	-0.276
R_transcript_13926	AvCIPK4	436	48764.2	8.86	40.4	85.85	-0.263
R_transcript_14605	AvCIPK5	438	50090.5	8.38	40.68	84.11	-0.432
R_transcript_14995	AvCIPK6	419	47208.7	8.93	36.67	92.36	-0.174
R_transcript_15110	AvCIPK7	438	49950.3	8.08	38.56	84.11	-0.394
R_transcript_15163	AvCIPK8	446	50685.2	6.38	41.38	91.28	-0.272
R_transcript_15368	AvCIPK9	439	49334.1	8.93	35.56	90.57	-0.225
R_transcript_15514	AvCIPK10	439	49546.2	9.03	35.36	91.41	-0.275
R_transcript_15669	AvCIPK11	441	49441.1	8.83	36.16	92.2	-0.171
R_transcript_15702	AvCIPK12	439	49365	8.86	35.57	92.37	-0.19
R_transcript_16308	AvCIPK13	432	48871.2	8.55	36.47	87.73	-0.311
R_transcript_16387	AvCIPK14	436	48734.2	8.86	39.95	86.08	-0.257
R_transcript_17112	AvCIPK15	448	49681.1	9.35	41.26	91.9	-0.151
R_transcript_22835	AvCIPK16	433	48208.6	9.2	42.7	91.92	-0.17
R_transcript_23731	AvCIPK17	412	47120.3	6.85	36.41	83.96	-0.408
R_transcript_29589	AvCIPK18	439	49605.3	9.1	35.19	91.41	-0.267
R_transcript_3277	AvCIPK19	472	53361.7	9.08	29.99	86.76	-0.375
R_transcript_33195	AvCIPK20	465	52683.8	9.09	32.93	85.16	-0.413
R_transcript_36613	AvCIPK21	447	50914.5	6.38	40.56	91.95	-0.266
R_transcript_37461	AvCIPK22	439	49316.8	9.03	34.43	89.89	-0.275
R_transcript_40474	AvCIPK23	460	51517.4	8.84	35.17	87.33	-0.302
R_transcript_42573	AvCIPK24	456	51135.1	8.82	36.23	90.2	-0.278
R_transcript_51271	AvCIPK25	439	50050.6	6.63	34.77	85.9	-0.387
R_transcript_53070	AvCIPK26	468	52807.2	6.42	39.54	83.93	-0.435
R_transcript_53700	AvCIPK27	446	50685.2	6.38	41.38	91.28	-0.272
R_transcript_53727	AvCIPK28	465	52683.8	9.09	32.93	85.16	-0.413
R_transcript_54267	AvCIPK29	452	50734.8	8.97	25.81	89.31	-0.262
R_transcript_59110	AvCIPK30	477	54536	8.36	33.19	84.36	-0.361
R_transcript_60450	AvCIPK31	433	48158.2	9.35	45.44	87	-0.252
R_transcript_62544	AvCIPK32	436	48806.1	8.98	40.25	82.96	-0.312
R_transcript_66275	AvCIPK33	439	49955.6	6.82	33.16	85.9	-0.378
R_transcript_70579	AvCIPK34	447	50757.3	6.38	41.5	91.71	-0.256
R_transcript_70788	AvCIPK35	439	49337	8.95	35.57	92.37	-0.184
R_transcript_73416	AvCIPK36	468	52927.3	6.4	38.53	84.15	-0.428
R_transcript_78088	AvCIPK37	436	48731.1	9.06	38.16	84.08	-0.299
R_transcript_85358	AvCIPK38	435	48558.9	8.48	36.14	88.51	-0.285
R_transcript_88112	AvCIPK39	433	48114.1	9.35	44.8	87	-0.258
R_transcript_89489	AvCIPK40	460	52541.6	7.97	34.34	84.3	-0.398
R_transcript_96602	AvCIPK41	448	50006	6.22	40.44	88.77	-0.406
R_transcript_9920	AvCIPK42	430	48303.8	9.03	36.14	87.07	-0.282

## Sheet: TableS2
The amino acid and nucleotide sequences of the AvCIPK family members
>AvCIPK1 | Symbols: R_transcript_100278
MSQPKIKRRVGIYDVGRTIGEGTFAKVKFARNSETGESVALKILDKEKVLKHKMAEQIKR
EVATMKLIKHPNVVRLYEVMGSKTKIFIVLEFVNGGELFDKIVNHGRMREDEARRYFQQL
INAVDYCHSRGVYHRDLKDDGLLHTTCGTPNYVAPEVLNDRGYDGATADLWSCGVILFVL
LAGYLPFDDSNLMNLYKKISAAEFTCPPWLSFGAMKLIAQILDPNPMTRITIPELLVDEW
FKKGYKPPVFEEKEDTNLDDVEAVFRDSEEHHVTEKKEEQPVAMNAFELISMSKGLNLGN
LFDVEQGFKRETRFTSKCPANEIVSKIEEAAKPLGFDVHKKNYKLRLENVKAGRKGNLNI
ATEVFQVAPSLHMVEVRKAKGDTLEFHKFYKNLSTCLEDVVWKTEEDMQEMK
>AvCIPK2 | Symbols: R_transcript_12876
MDNRGTVLMERYELGRLLGQGTFAKVYYARNVQAGQSVAIKVIDKEKILRVGHIDQIKRE
ISIMRLVRHPNIVQIFEVMATKTKIYFVMEYAKGGELFNKVAKGKLKEEVARKYFQQLIN
AVDFCHSRGVYHRDLKPENLLLDENENLKVSDFGLSALAESKHQDGLLHTTCGTPAYVAP
EVINRRGYDGEKADVWSCGVILFVLLAGYLPFHDSNLMEMYRKIGKAEYKCPNWFPAEVR
KLLLRILDPNPNTRISIAKIKETSWFKKGLNSKLTKIKTENTENVFPNADVASGPCATSS
TAAEEKQELLRAANLNAFDIISLSAGFDLSGLFEEPRLKKEARFTSRQPASVILSKLEEI
AKHLKLRVRKKEAGLVKFEGLKEGRKGILSIDAEIFEVTPSFHLVELKKSDGDTLEYQKV
LNEGMRPALQDIVWVWQGEQQQPPLELHSEPVPQQLPQSSQQQLQQQQLQELLPSS
>AvCIPK3 | Symbols: R_transcript_13797
MADHKGSEKSQPHCVLHGKYELGRLLGHGTFAKVYRARHLVTGNNVAMKVVGKEKVMKVG
MTEQVKREISVMKMVQHPNIVELHEVMASKTKIYFAMELVRGGELFSKVAKGRLREDAAR
NYFQQLISAVDFCHSRGVYHRDLKPENLLLDDDGNLKVTDFGLSAFADHLRQDGLLHTTC
GTPAYVAPEVIGKKGYDGSKADIWSCGVILYVLLAGFLPFQEDNIVSLYRKIYRGDFKCP
PWFSPESRRLITKLLDPNPSTRITAAKIMESSFFRKTIPRSVSRAKDEESVTMEEKPKAE
TLNAFHIISLSEGFDLSPLFEEKRREEKEELRFATAGPASSVISLLEEVAATAAGKFSVR
RSGDTSVRLQGEENGRMGKLAIAVDIFALTPSFLVVEVKKSSGDTLEYNQFCSKELRPAL
KDILWTSPVTQNCTPV
>AvCIPK4 | Symbols: R_transcript_13926
MTDHKGSEKSQPHCVLHGKYELGRLLGHGTFAKVYRARHLVTGNSVAMKVVGKEKVMKVG
MTEQVKREISVMKMVQHPNIVELHEVMASKTKIYFAMELVRGGELFSKVAKGRLREDAAR
NYFQQLISAVDFCHSRGVYHRDLKPENLLLDDDGNLKVTDFGLSAFADHLRQDGLLHTTC
GTPAYVAPEVIGKKGYDGAKADIWSCGVILYVLLAGFLPFQEDNIVSLYRKIYRGDFKCP
PWFSPESRRLITKLLDPNPSTRITAAKIMESSFFRKTIPRSVSRAKDEESVIMEEKPKTE
TLNAFHIISLSEGFDLSPLFEEKRREEKEELRFATAGPASSVISLLEEVAATAAGKFSVR
RSGDTSVRLQGEENGRMGKLAIAVDIFALTPSFLVVEVKKSSGDTLEYNQFCSKELRPAL
KDILWTSPVTQNCTPV
>AvCIPK5 | Symbols: R_transcript_14605
MNAKRTRVGRYEIGKTLGEGSFAKVKFAKNIDTDDFVAIKIIDRDRVLHHRMVEQIKREI
STMKLIKHPNVLKLIEVMASKTKIYIVLEYVDGGELFDKIAKQGRLKEDEARRYFQQLIN
AVDYCHSRGVYHRDLKPENLLLDSFGVLKVSDFGLSAFSQQVREDGLLHTACGTPNYVAP
EVLNDKGYDGTSADIWSCGVILFVLMAGYLPFDEPNLMALYRRIHKADFSCPSWFTSGAK
KLIKRIIDPNPLTRITIPEILENDWFKKGYKPPQFEQGEDVNLDDVDAVFNDSEEHLVTE
KKEKPVSMNAFELISRSQGFSLENLFEKQMGLVKRETRFTSKYPANEIMSKIEEAAKPLG
FNVHKRNYKMKLQGDKTGRKGHLSVATEVFEVAPSLHMVELRKTGGDTLEFHKFYKTFSS
GLKDIVWNSESIAEETRS
>AvCIPK6 | Symbols: R_transcript_14995
MNNNALFGKYELGRLLGCGAFAKVYHARNIATGQSVAVKVISKNKIAGTNLMSNVKREIA
IMRRLRHPHIVKLFEVLATKTKIYFVMEFVKGGELFAKVAKGRFSEDLSRKYFHQLISAV
GFCHSRGVFHRDLKPENLLLDENGDLKVSDFGLSAVNDQIRLDGLLHTLCGTPAYVAPEI
LAKKGYDGAKVDVWSCGVILFVLTAGYLPFNDPNLMMMYKKIYKGEFRCPKWMSSDLRRF
LSRLLDTNPETRITVDEIVRHPWFKKDCKEINFYYEEEFDKAAEKEEKNALALNAFDLIS
FSPGLNLSGLFDDSANSSDHGERFVLAESPERIIQKVEEVVKGERVVRLRKKKEWGIELE
GLHGNFVLGLEIYRLTDSLVVVEASQKGGSAGGLFNDLWKNKIKPAFISSPEAPVPCG
>AvCIPK7 | Symbols: R_transcript_15110
MNATRTRVGRYEIGKTLGEGSFAKVKFAKNIDTGDFVAIKIIDRDRVLHHRMVEQIKREI
STMKLIKHPNVLKLFEVMASKTKIYIVLEYVDGGELFDKIAKQGRLKEDEARRYFQQLIN
AVDYCHSRGVYHRDLKPENLLLDSFGVLKVSDFGLSAFSQQVREDGLLHTACGTPNYVAP
EVLNDKGYDGTSADIWSCGVILFVLMAGYLPFDEPNLMALYRRIHKADFSCPPWFTSGAK
KLIKRIIDPNPLTRITIPEILENDWFKIGYKPSQFEQGDDVNLDDVDAVFNDSEEHLVTE
KKEKPVSMNAFELISRSQGFSLENLFEKQMGLVKRETRFTSKCPANEIMSKIEEAAKPLG
FNVHKRNYKMKLQGDKTGRKGHLSVATEVFEVAPSLHMVELRKTGGDTLEFHKFYKTFSS
GLKDIVWNSESIAEETRS
>AvCIPK8 | Symbols: R_transcript_15163
MVVRKVGKYEVGRTIGEGTFAKVKFAQNTETGESVAMKVLDRTTILKHKMVDQIKREISI
MKLVRHPNVVRLHEVLASRTKIYIILEFITGGELFDKIVHHGRLSEADSRRFFQQLIDGV
DYCHSKGVYHRDLKPENLLLDSEGNLKISDFGLSALPGEGVSLLRTTCGTPNYVAPEVLG
HKGYDGAVADVWSCGVILYVLMAGYLPFDEIDLTTLYSKIDKAEFSCPSWFPVGAKSLIH
RILDPNPETRIRIEEIRSDEWFKRSYVPVKLIEYEDVNLDDVNAVFDDPEEEQVDEKGRN
EHLGPLTLNAFDLIILSEGLNLSSLFDRRQDSANHQTRFVCQKPAQVVLSTMEVVAQSMG
FKTHIRNYKMRVEGLSANKTSHFSVILEVFEVAPTFLMVDMQKAAGDAGEYLKFYKNFCD
NLEDIIWRPSNEPCKSRVTKTKSKRR
>AvCIPK9 | Symbols: R_transcript_15368
MKEIEHATTTSPLATVVATMATKMDNKALFGKYELGRLLGCGAFAKVYHARNIVTGQNVA
VKVISKNKITGTNLMSNVKREIAIMRRLRHPHIVKLFEVLATKTKIYFVMEFVKGGELFA
KVAKGRFSEDLSRKYFHQLISAVGYCHARGVFHRDLKPENLLLDENDDLKVSDFGLSAVT
DQIRHDGLLHTLCGTPAYVAPEILAKKGYDGAKADVWSSGVVLFVLTAGYLPFNDPNLMM
MYKKIYKGEFRCPKWMSSDLKRFLSRLLDTNPATRITVDEIVRHPWFKKDCKEINFYYEE
ELDKAEKEEKNGLALNAFDLISFSSGLNLSGLFDDSANSSGDCDRFVSVESPDRVIKKVE
EAVKGEKVVRLRKKKQWGIELEGLNGNFVIELEVHPLTDSLVLVEATRRGGSTGLFNDVW
KNKIKPGLIFSQEEPVPGS
>AvCIPK10 | Symbols: R_transcript_15514
MRRNIIGGVMPVIEDEVGNVLPPAGDIPADSVKTLFGKYEVGKLLGYGAFAKVYHGRDVR
TGQSVAIKAVSKQKVLRGGSTANVKREISIMRRMRHQHIVRLLEVMATKTKIYFVLEFAK
GGELFAKVAKGRFSEDLSRRYFQQLISAIGYCHSHGVFHRDLKPENLLLDENWDLKVTDF
GLSAVKDQIRADGLLHTLCGTPAYVAPEILAKKGYDGAKVDVWSCGVILYVLNAGFLPFN
DPNLMVMYRKIYKGEFRCPKWTSPDLKRFLSRLLDTNPDTRITVDEMVNDPWFKKGYKEI
KFHSEDFEIKENGDSGKFLNAFDIISFSSGIDLSSLFNEPEVSAVGERFLSAESPERVIE
KVEEVAKAEGLTVTRKKDLGVKLEGQNSNFVALVEVHRLTEKLVVVEVKRRESEAGPSRE
IWKDKLRPQLSSIVYQPER
>AvCIPK11 | Symbols: R_transcript_15669
MQEIEHATTASLPATVATTSATKMNNNALFGKYELGRLLGCGAFAKVYHARNIATGQSVA
VKVISKNKIAGTNLISNVKREIAIMRRLRHPHIVKLFEVLATKTKIYFVMEFVKGGELFA
KVAKGRFSEDLSRKYFHQLISAVGFCHSRGVFHRDLKPENLLLDENGDLKVSDFGLSAVN
DQIRLDGLLHTLCGTPAYVAPEILAKKGYDGAKVDVWSCGVILFVLTAGYLPFNDPNLMM
MYKKIYKGEFRCPKWMSSDLRRFLSRLLDTNPETRITVDEIVRHPWFKKDCKEINFYYEE
EFDKAAEKEEKNALALNAFDLISFSPGLNLSGLFDDSANSSDHGERFVLAESPERIIQKV
EEVVKGERVVRLRKKKEWGIELEGLHGNFVLGLEIYRLTDSLVVVEASQKGGSAGGLFND
LWKNKIKPAFISSHEAPVPCG
>AvCIPK12 | Symbols: R_transcript_15702
MQEIEHATTASLLETVASTSATKMNNNALFGKYELGRLLGCGAFAKVYHARNIATGQSVA
VKVISKNKIAGTNLMSNVKREIAIMRRLRHPHIVKLFEVLATKTKIYFVMEFVKGGELFV
KVAKGRFSEDLSRKYFHQLISAVGYCHSRGVFHRDLKPENLLLDENGDLKVSDFGLSAVN
DQIRLDGLLHTLCGTPAYVAPEILAKKGYDGAKVDVWSCGVILFVLTAGYLPFNDPNLMM
MYKKIYKGEFRCPKWMSSDLRRFLSRLLDTNPETRITVDEIVRHPWFKKDCKEINFYYEE
AFDKAEKEEKNGLALNAFDLISFSPGLNLSGLFDDSANSSGHGERFLSADSPERIIQKVE
EVVKGERVVRLRKKKEWGIELEGFHGNFVLGLEIYRLTDSLVVVEASRKGDSADLFNDVW
KNKIKPALISSPEAPVPGV
>AvCIPK13 | Symbols: R_transcript_16308
MRRNIMEGGMPVIGDEAGEIPENSEKNLFGKYELGKLLGYGAFAKVYHGRDVRTGQSVAI
KAVSKQKVLKGGLAAQVKREISIMRRMGHQHIVRLFEVMATKTKIYFVLDFAKGGELFAK
VARGRFSEDLSRRYFQQLISAIGYCHSHGVFHRDLKPENLLLDENWDLKVTDFGLSAVKD
QIRADGFLHTLCGTPAYVAPEILAKNGYDGAKVDVWSCGVILYVLNAGFLPFNDPNLMVM
YRKIYKGEFSCPKWTSPDLKRFLSRLLDTNPETRITVDEIVHDPWFKKGYKEIKFHSEDF
EFKDDGDSGKFLNAFDIISFSSGIDLSGLFNNPEVSACDERFLSPESPERVIGKVEEVAK
AEGLTVTRKKDLGVKLEGHNGHFVALVEVKRLTEKLVVVEVNRREIEAGPSREIWKDKLR
PQLSSLVYQPER
>AvCIPK14 | Symbols: R_transcript_16387
MTDHKGSEKSQPHCVLHGKYELGRLLGHGTFAKVYRARHLVTGNSVAMKVVGKEKVMKVG
MTEQVKREISVMKMVQHPNIVELHEVMASKTKIYFAMELVRGGELFSKVAKGRLREDAAR
NYFQQLISAVDFCHSRGVYHRDLKPENLLLDDDGNLKVTDFGLSAFADHLRQDGLLHTTC
GTPAYVAPEVIGKKGYDGAKADIWSCGVILYVLLAGFLPFQEDNIVSLYRKIYRGDFKCP
PWFSPESRRLITKLLDPNPSTRITAAKIMESSFFRKTIPRSVSRAKDEESVIMEEKPKAE
TLNAFHIISLSEGFDLSPLFEEKRREEKEELRFATAGPASSVISLLEEVAATAAGKFSVR
RSGDTSVRLQGEENGRMGKLAIAVDIFALTPSFLVVEVKKSSGDTLEYNQFCSKELRPAL
KDILWTSPVTQNCTPV
>AvCIPK15 | Symbols: R_transcript_17112
GVWPNLLLSLPLFLNRARAAPGRPNPMAPRSSAATSTTTTNGIILDKYRLGRLLGRGSFA
KVYQAQSLSNNTTVAIKVIDKAKTVDASMEPRIVREIAAMRRLSHHSNILQIHEVMATKT
KIYLVMDLAAGGDLSTALARRRLPESAARRYFQQLVSALHFCHRQGVAHRDIKPQNLLLD
SAGTLKISDFGLAALPENRENLLHTACGTPAFAAPEVVRRGGGYDGAKADAWSCGVILFL
FLAGNLPFDDSNLAAMFKKICRREFQFPDWISKQSKFIIYRLLDPNPNSRMTLETLIDHS
WFKKSLQLDPSAQNPPPQFSKFKVERETMNAFDIISMSSGLDLSGLFEPSSSSERERRFT
AKATEVAVEERVGEVGERLGYRVDREKGRRSVGLLKGRVVLEFEIIVVAEGLVMVVVMVV
GGGFEEVNWEDLRVGFGDIALDWHNEGS
>AvCIPK16 | Symbols: R_transcript_22835
MAMERPAPPRSSAATTTTTTNGIVLGKYRLGRLLGRGSFAKVYLAQSLSNNTTVAIKVID
KAKTVDAAMEPRIVREVAAMRRLSHHPNILQIHEVMATKTKIYLVMDLAAGGDLSTALAR
RRCRLPESGARRYFQQLVSALHFCHRQGVVHRDVKPQNLLLDSDGTLKISDFGLAALQEN
RENLLLHTACGTPAFAAPEVIRRGGGGYDGAKADAWSCGVILFVFLAGNLPFDDSNLAAM
YQKICRREFQFPDWISKQSKFIIYRLLDPNPISRMTLEALIDHSWFKKSLQLDPSEQNRP
PKFCKFEAKRETMNAFDIISMSSGLDLSGLFQPSLNSERERRFTAKASSVEAVEETVGEA
GERLGYKVDREKDRRTIGLLKGRVLLEFEILVVAKGLVMVVVRVVGVGFEDVNWEDLRVG
FGDIALDWHNEGS
>AvCIPK17 | Symbols: R_transcript_23731
MSQPKIKRRVGIYDVGRTIGEGTFAKVKFARNSETGESVALKILDKEKVLKHKMAEQIKR
EVATMKLIKHPNVVRLYEVMGSKTKIFIVLEFVNGGELFDKIVNHGRMREDEARRYFQQL
INAVDYCHSRGVYHRDLKDDGLLHTTCGTPNYVAPEVLNDRGYDGATADLWSCGVILFVL
LAGYLPFDDSNLMNLYKKISAAEFTCPPWLSFGAMKLIAQILDPNPMTRITIPELLVDEW
FKKGYKPPVFEEKEDTNLDDVEAVFRDSEEHHVTEKKEEQPVAMNAFELISMSKGLNLGN
LFDVEQGFKRETRFTSKCPANEIVSKIEEAAKPLGFDVHKKNYKLRLENVKAGRKGNLNI
ATEVFQVAPSLHMVEVRKAKGDTLEFHKFYKNLSTCLEDVVWKTEEDMQEMK
>AvCIPK18 | Symbols: R_transcript_29589
MRRNIIGGVMPVIEDEVGNVLPPAGDIPADSVKTLFGKYEVGKLLGYGAFAKVYHGRDVR
TGQSVAIKAVSKQKVLRGGFTANVKREISIMRRMRHQHIVRLLEVMATKTKIYFVLEFAK
GGELFAKVAKGRFSEDLSRRYFQQLISAIGYCHSHGVFHRDLKPENLLLDENWDLKVTDF
GLSAVKDQIRADGLLHTLCGTPAYVAPEILAKKGYDGAKVDVWSCGVILYVLNAGFLPFN
DPNLMVMYRKIYKGEFRCPKWTSPDLKRFLSRLLDTNPDTRITVDEMVNDPWFKKGYKEI
KFHSEDFEIKENGDSGKFLNAFDIISFSSGIDLSSLFNQPEVSAVGERFLSAESPERVIE
KVEEVAKAEGLTVTRKKDLGVKLEGQNSNFVALVEVHRLTEKLVVVEVKRRESEAGPSRE
IWKDKLRPQLSSIVYQPER
>AvCIPK19 | Symbols: R_transcript_3277
MENKGIVLMQRYELGRLLGQGTFAKVYHARNLKTGRSVAIKMIDKEKVFMVGMIDQIKRE
ISVMKLVRHPNIVQLYEVMANKSKIYFVMEYVKGGELFNKVAKGKLKEHVARKYFQQLIS
AVDFCHSRGVYHRDLKPENLLLDENGNLKVSDFGLSALTKSKHQDGLLHTTCGTPAYVAP
EVINGKGYDGSKADIWSCGVILYVLLAGALPFQDSNLMEMYRKIGKAEFEFLNWFSPGAR
RLISKILDPNPNARISISKIMESSWFRKGFDYKSMRVKMEEKDPDSLNANAIFGPCEDSS
PAAEAKLDLVRPSNLNAFDIISFSAGFDLTGLFEENDQKKEVQFTSNQTAKTIISKLEDI
AKRLKLKIMKKKGGVLKLEGAKEGRKGALSIDTEIFEVTPTFHLVEVKKSSGDTLEYQKM
MKHDIRPALKDIVWTWQGDQPRTQQQQDDEPELESSQLLPLQAISPQSVTSY
>AvCIPK20 | Symbols: R_transcript_33195
MENKEIVLMQQYELGRLLGQGTFAKVYHARNLTTGQSVAIKMIHKEKVFKVGMFDQIKRE
ISVMKLVRHPNIVQLYEVMASKSKIYFVMEYVKGGELFDKVSKGKLKEDIARNYFQQLIS
AVDFCHSRGVYHRDLKPENILLDENGNLKVSDFGLSALTESKRQDGLLHTTCGTPAYVAP
EVINRKGYDGSKADIWSCGIILYVLLAGALPFHGSNLMEMYRKIGKAEFEFPNWFSPRAR
RLISKILDPNPNTRISIPKIMESSWFRKGFDYKSMRVKMEEKDPDSLNADAIFGPCEDSS
TAAEAKQDLAKPSNLNAFDIISFSAGFDLSGLFEENDRKKEARFTSNQTAKTIISKLEDI
AKRLKLKILKKNGGVLKLEGAKEGRKGALSIDAEIFEVTPTFHLVEVKKSSGDTLDYQKM
MKKYIRPALKDIVWTWQGDLPRTQPQQDDEPESSQLLPLQAISSQ
>AvCIPK21 | Symbols: R_transcript_36613
MVVRKVGKYEVGRTIGEGTFAKVKFAQNTETGESVAMKVLDRTTILKHKMVDQIKREISI
MKLVRHPNVVRLHEVLASRTKIYIILEFITGGELFDKIVHHGRLSEADSRRFFQQLIDGV
DYCHSKGVYHRDLKPENLLLDSEGNLKISDFGLSALPGEGVSLLRTTCGTPNYVAPEVLS
HKGYDGAVADVWSCGVILYVLMAGYLPFDEIDLTTLYSKIDKAEFSCPSWFPVGAKSLIH
RIIDPNPETRIRIEEIRNDEWFKRSYVPVKLIEYEDVNLDDVNAVFDDPEEEQVDEKCRN
EHLGPLTLNAFDLIILSEGLNLSSLFDRRQDSANHQTRFVCQKPAQVVLSTMEVVAQSMG
FKTHIRNYKMRVEGLSANKTSHFSVILEVFEVAPTFLMVDMQKAAGDAGEYLKFYKNFCD
NLEDIIWRPSNEPCKSRVIKTNKSKRR
>AvCIPK22 | Symbols: R_transcript_37461
MRRNIIGGVMPVIEDESGNVLPPAGDIPADSEKTLFGKYEVGKLLGYGAFAKVYHGRDVR
TGQSVAIKAVSKQKVLKGGFTANVKREISIMRRMRHHHIVRLLEVMATKTKIYFVLEFAK
GGELFAKVAKGRFSEDLSRRYFQQLITAIGYCHSHGVFHRDLKPENLLLDENWDLKVTDF
GLSAVKDQIRADGLLHTLCGTPAYVAPEILAKKGYDGAKVDVWSCGVILYVLNAGFLPFN
DPNLMVMYRKIYKGEFRCPKWTSPDLKRFLSRLLDTNPDTRITVDEMANDPWFKKGYKEI
KFQSEDFEIKDNGDSGKFLNAFDIISFSSGIDLSGLFNQPEGSAVGERFLSAESPERVIG
KVEEVAKAEGLTVTSKKDLGVKLEGQNGHFVALVLVHRLTEKLVVVEVNRRESEAGPSRE
IWKDKLRPQLSSIVYQPER
>AvCIPK23 | Symbols: R_transcript_40474
MSSRSGGSGIGGGGRTRVGRYELGRTLGEGTFAKVKFARNVESEENVAIKILDKEKILKH
KMISQIKREISTMKLIRHPNVIRMFEVMASKTKIYIVLEFVTGGELFDKIASKGRLKEDE
ARRYFQQLINAVDYCHSRGVFHRDLKPENLLLDANGVLKVSDFGLSALPQQVREDGLLHT
TCGTPNYVAPEVINNKGYDGAKADLWSCGVILFVLMAGYLPFEESNLMALYKKIFKADFT
CPSWFSSSAKKLIKRILDPNPMTRITIAELIENEWFKKGYKPPTFEQADVSLDDVDAIFD
ESGDTQNLVVERREERATAVFMNAFELISKSEGLNLSSLFEKQMGLVKRETRFTSKCPAN
EIISKIKEAAAPLGFDVKKNNHKLKLQGEKTGRKGHLSVATEVFEVAPSLCMVELRKAGG
DTLEFHKFYKNLATGLKDIVWKSVNEAEEKAHDDVGIVSS
>AvCIPK24 | Symbols: R_transcript_42573
MASRSSGSGGRTRVGRYELGRTLGEGTFGKVKFARNVESEEIVAIKILDKEKILKHKMIS
QIKREISTMKLIRHPNVIRIFEVMASKTKIYIVLEFVTGGELFDKIVTKGRLKEDEARKY
FQQLINAVDYCHSRGVFHRDLKPENLLLDANGVLKVSDFGLSALPQQVREDGLLHTTCGT
PNYVAPEVINNKGYDGAKADLWSCGVILFVLVAGYLPFEESNLMALYKKIFKADFTCPSW
LSSSAKKLIKRILDPSPMTRITIAELIENEWFKKGYKPPTFEQADVSLDDVDGIFDESGD
THNLVVERREERATPVSMNAFELISKSQGLNLSSLFEKQMGLVKRETRFTSKCPAKEIIS
KIEEAAAPLGFDVKKYNYKLKLQGEKTGRKGHLSVATEVFEVAPSLCMVELRKAGGDTLE
FHKFYKNLATGLKDIVWKSVDETKEEANDGVGIVSS
>AvCIPK25 | Symbols: R_transcript_51271
MSQPKIKRRVGIYDVGRTIGEGTFAKVKFARNSETGESVALKILDKEKVLKHKMAEQIKR
EVATMKLIKHPNVVRLYEVMGSKTKIFIVLEFVNGGELFDKIVNHGRMREDEARRYFQQL
INAVDYCHSRGVYHRDLKPENLLLDAYGNLKVSDFGLSALSQQVRDDGLLHTTCGTPNYV
APEVLNDRGYDGATADLWSCGVILFVLLAGYLPFDDSNLMNLYKKISAAEFTCPPWLSFG
AMKLIAQILDPNPMTRITIPELLVDEWFKKGYKPPVFEEKEDTNLDDVEAVFRDSEEHHV
TEKKEEQPVAMNAFELISMSKGLNLGNLFDVEQGFKRETRFTSKCPANEIVSKIEEAAKP
LGFDVHKKNYKLRLENVKAGRKGNLNIATEVFQVAPSLHMVEVRKAKGDTLEFHKFYKNL
STCLEDVVWKTEEDMQEMK
>AvCIPK26 | Symbols: R_transcript_53070
MGYVNTIGKYQLGRTIGEGTFAKVKLAANTEDGHYVAIKVIDKHMVIENNLMHQVQREIS
TMKLLHHPNITRIHEVIGTKTKIYIVMEYVSGGVLSDKMSYVNRLSEREARKHFQQLIDA
VDYCHCRGVYHRDLKPQNLLLDSKGNLKVSDFGLSALRKPGLLSTACGSPSYVAPELLTN
KGYEGAAADVWSCGVLLFELLAGYLPFDDRNLMNLYRKILRAEYKFPDWFTESQKKLISR
IFDPNPQKRIKIPDIIDDEWFQTNYEPAVRIECGEDINFDDVHAAFNSVKENVTEKKIPP
TPSFINAFQLIAMSHDLDLSGLFEEQDNEKQKTTLGSKHTINETIEKIEAAAKDVSLSVE
RMNKSKVKIHPNQKMTRCSRSCFNLSAEVIEVAPTHCVVEISKSVGELEPYREFCKSLSS
MLSEESGVPFETQSPKAGTASSKSIQQNESIVQNDDKDPKDLRGYSSS
>AvCIPK27 | Symbols: R_transcript_53700
MVVRKVGKYEVGRTIGEGTFAKVKFAQNTETGESVAMKVLDRTTILKHKMVDQIKREISI
MKLVRHPNVVRLHEVLASRTKIYIILEFITGGELFDKIVHHGRLSEADSRRFFQQLIDGV
DYCHSKGVYHRDLKPENLLLDSEGNLKISDFGLSALPGEGVSLLRTTCGTPNYVAPEVLG
HKGYDGAVADVWSCGVILYVLMAGYLPFDEIDLTTLYSKIDKAEFSCPSWFPVGAKSLIH
RILDPNPETRIRIEEIRSDEWFKRSYVPVKLIEYEDVNLDDVNAVFDDPEEEQVDEKGRN
EHLGPLTLNAFDLIILSEGLNLSSLFDRRQDSANHQTRFVCQKPAQVVLSTMEVVAQSMG
FKTHIRNYKMRVEGLSANKTSHFSVILEVFEVAPTFLMVDMQKAAGDAGEYLKFYKNFCD
NLEDIIWRPSNEPCKSRVTKTKSKRR
>AvCIPK28 | Symbols: R_transcript_53727
MENKEIVLMQQYELGRLLGQGTFAKVYHARNLTTGQSVAIKMIHKEKVFKVGMFDQIKRE
ISVMKLVRHPNIVQLYEVMASKSKIYFVMEYVKGGELFDKVSKGKLKEDIARNYFQQLIS
AVDFCHSRGVYHRDLKPENILLDENGNLKVSDFGLSALTESKRQDGLLHTTCGTPAYVAP
EVINRKGYDGSKADIWSCGIILYVLLAGALPFHGSNLMEMYRKIGKAEFEFPNWFSPRAR
RLISKILDPNPNTRISIPKIMESSWFRKGFDYKSMRVKMEEKDPDSLNADAIFGPCEDSS
TAAEAKQDLAKPSNLNAFDIISFSAGFDLSGLFEENDRKKEARFTSNQTAKTIISKLEDI
AKRLKLKILKKNGGVLKLEGAKEGRKGALSIDAEIFEVTPTFHLVEVKKSSGDTLDYQKM
MKKYIRPALKDIVWTWQGDLPRTQPQQDDEPESSQLLPLQAISSQ
>AvCIPK29 | Symbols: R_transcript_54267
MEKKGNVLMKRFDWGRLLGQGNFAKVYYGRNLESGQSVAIKVIDKERVLKVGLMDQTKRE
ISVMGLVKHPNIVQLYEVMATKTKIYLIMEYAKGGELFHKVVKGRLKEDIARKYFQQLIC
AVDFCHGMGVYHRDLKPENLLLDEYGNLKVTDFGLSAFAESNRQDGLLHTTCGTPAYVAP
EVISRRGYDGVKADIWSCGVILFVLLAGHLPFHDSNLMEMYRKISKGDFKCPNWFPLEVR
KLLCTILNPNPYTRTSIAKIMENPWFRKGFDTKSKTIEVERKEMPPPTADGICNPCGASG
GTAAAAAAAEAKIESPKPTNLNAFDIISLSTGFDLSGLFVENDQKEQVQFTSAKPASAII
SRLGEIGKHLKLKVVKKDGGLLKFERPNEGARGALCIDIEIFEITSSFHAVEVKKSRGDV
LEYRKILKLDIRPALNDIVWAWQGEEHHHQQQ
>AvCIPK30 | Symbols: R_transcript_59110
EISFLRTCSITLNCYLFMEKFTSVRNCNYKRISTCKSSMSQPKIKRRVGIYEVGRTIGEG
TFAKVKFARNSETGDSVALKILDKEKVLKHKMAEQIKREVATMKLIKHPNVVRLYEVMGS
KTKIFIVLEFVTGGELFDKIVNHGRMREDEARRYFQQLINAVDYCHSRGVYHRDLKPENL
LLDAYGNLKVSDFGLSALSQQVRDDGLLHTTCGTPNYVAPEVLNDRGYDGATADLWSCGV
ILFVLLAGYLPFDDSNLMNLYKKISAAEFTCPPWLSFGAMKLIARILDPNPMTRITIPEL
LVDEWFKKGYKPPVFEEKEDTNLDDVEAVFRDSEEHHVTEKKEEQPVAMNAFELISMSKG
LNLGNLFDVEQGFKRETRFTSKCPANEIVSKIEEAAKPLGFDVHKKNYKLRLENVKAGRK
GNLNVATEVFQVAPSLHMVEVRKAKGDTLEFHKFYKKLSTCLEDVVWKTEEDMQEMK
>AvCIPK31 | Symbols: R_transcript_60450
MAMERPAPPRSSAATTTTTNNGIILGKYRLGRLLGRGSFAKVYQAQSLSNDTTVAIKVID
KAKTVDASMEPRIVREIAAMRRLSHHSNILQIHEVMATKTKIYLVMDLAAGGDLSSALAR
RRRRHLPESAARRYFQQLVSALHFCHRQGVAHRDIKPQNLLLDSAGTLKISDFGLAALPE
NRENLLHTACGTPAFAAPEVVRRGGGYDGAKADAWSCGVILFLFLAGNLPFDDSNLASMF
QKICRREFQFPDWISKQSKFIIYRLLDPNPNSRMTLETLIDHSWFKKSLQLDPSAQNPPP
QFSKLQAQAKRQTMNAFDIISMSSGLDLSGLFEPSSTRERERRFTAKATEAAVEERVGEV
GERLGYRVDREKDRKSVGLLKGRVVLEFEIMVVAEGLVMVVVMVGGGGFEEVNWEDLRVG
FGDIALDWHNEGS
>AvCIPK32 | Symbols: R_transcript_62544
MTDHKGSEKSQPHCVLHGKYELGRLLGHGTFAKVYHARHLVTGKSVAMKVVGKEKVMKVG
MTEQVKREISVMKMVQHPNIVELHEVMASKTKIYFAMELVRGGELFSKVAMGRLREDAAR
NYFQQLISAVDFCHSRGVYHRDLKPENLLLDDDGNLKVTDFGLSAFADHLRQDGLLHTTC
GTPAYVAPEVIGKKGYDGAKADIWSCGVILYVLLAGFLPFQDDNIVSLYRKIYRGDFKCP
PWFSPESRRLITKLLDPNPSTRITAAKIMESSFFRKTIPRSMSRAKDEESVIMEDKHKTE
TLNAFHIISLSEGFDLSPLFEEKRREEKEELRFATAGPASSVISRLEEVAARAAGKFSVS
RRGDTSVRLQGEENGRKGKLAIAADIFAVTPSFLVVEVKKSSGDTLEYNKFCSEELRPAL
KDIVWTSTVTQNSTPA
>AvCIPK33 | Symbols: R_transcript_66275
MSKPKIKRRVGIYEVGRTIGEGTFAKVKFAKNSETGEAVALKILDKEKVLKHKMAEQIKR
EVATMKLIKHPNVVCLYEVMGSKTKIFIVLEFVTGGELFDKIVNQGRMKEDEARRYFQQL
INAVDYCHSRGVYHRDLKPENLLLDACGKLKVSDFGLSALSQQVRDDGLLHTTCGTPNYV
APEVLNDRGYDGATADLWSCGVILFVLLAGYLPFDDSNLMNLYKKISAAEFTCPPWLSFG
AMKLITRILDPNPMTRITIPEILVDEWFKKGYKPPVFEEKEDTNLDDVEAVFRDSEEHHV
TEKKEEQPTAMNAFELISMSKGLNLGNLFDVEQEFKRETRFTSKCPANEIVSKIEEAAKP
LGFDVHKKNYKLRLENVKAGRKGNLNVATEVFQVAPSLHMVEVRKAKGDTLEFHKFYKNL
STSLEDVVWKTEEDMQELK
>AvCIPK34 | Symbols: R_transcript_70579
MVVVRKVGKYEVGRTIGEGTFAKVKFAQNTETGESVAMKVLDRTTILKHKMVDQIKREIS
IMKLVRHPNVVRLHEVLASRTKIYIILEFITGGELFDKIVHHGRLSEADSRRFFQQLIDG
VDYCHSKGVYHRDLKPENLLLDSEGSLKISDFGLSALPGEGVSLLRTTCGTPNYVAPEVL
GHKGYDGAVADVWSCGVILYVLMAGYLPFDEIDLTTLYSKIDKAEFSCPSWFPVGAKSLI
HRILDPNPETRIRIEEIRSDEWFKRSYVPVKLIEYEDVNLDDVNAVFDDPEEEQVDEKGR
NEHLGPLTLNAFDLIILSEGLNLSSLFDRRQDSANHQTRFVCQKPAQVVLSTMEVVAQSM
GFKTHIRNYKMRVEGLSANKTSHFSVILEVFEVAPTFLMVDMQKAAGDAGEYLKFYKNFC
DNLEDIIWRPSNEPCKSRVTKTKSKRR
>AvCIPK35 | Symbols: R_transcript_70788
MQEIEHATTASLLETVASTSATKMNNNALFGKYELGRLLGCGAFAKVYHARNIATGQSVA
VKVISKNKIAGTNLMSNVKREIAIMRRLRHPHIVKLFEVLATKTKIYFVMEFVKGGELFV
KVAKGRFSEDLSRKYFHQLISAVGYCHSRGVFHRDLKPENLLLDENGDLKVSDFGLSAVN
DQIRLDGLLHTLCGTPAYVAPEILAKKGYDGAKVDVWSCGVILFVLTAGYLPFNDPNLMM
MYKKIYKGEFRCPKWMSSDLRRFLSRLLDTNPETRITVDEIVRHPWFKKDCKEINFYYEE
AFDKAEKEEKNGLALNAFDLISFSPGLNLSGLFDDSANSSGHGERFLSADSPERIIQKVE
EVVKGERVVRLRKKKEWGIELEGFHGNFVLGLEIYRLTDSLVVVEASRKGSSADLFNDVW
KNKIKPALISSPEAPVPGV
>AvCIPK36 | Symbols: R_transcript_73416
MGYVHTIGKYQLGRTIGEGTFAKVKLAANTEDGHYVAIKVIDKHMVIENNLMHQVQREIS
TMKLLHHPNITRIHEVIGTKTKIYIIMEYVSGGVLSDMMSYVNRLSEREARKHFQQLIDA
VDYCHCRGVYHRDLKPQNLLLDSKGNLKVSDFGLSALRKHGLLSTACGSPSYVAPELLTN
KGYEGAAADVWSCGVLLFELLAGYLPFDDRNLMNLYRKILRAEYKFPDWFTESQKKLISR
IFDPNPQKRIKIPDIIDDEWFQTNYEPAVRIECGEDINFDDVHAAFNSVKENVTEKKIPH
TPSFINAFQLIAMSHDLDLSGLFEEQDNEKQKTTLGSKHTINETIEKIEAAAKDVSLSVE
RMNKSKVKIHPNQKMTRCSRSCFNLSAEVIEVAPTHCVVEISKSVGELEPYREFCKSLSS
MLSEESGVPFETQSPKAGTASSKSIQQNESIVQNDDKDPKDLRGYSSS
>AvCIPK37 | Symbols: R_transcript_78088
MADHKGSEKSQPHCVLHGKYELGRLLGHGTFAKVYHARHLVTGKSVAMKVVGKEKVMKVG
MTEQVKREISVMKMVQHPNIVELHEVMASKTKIYFAMELVRGGELFSKVAMGRLREDAAR
NYFQQLISAVDFCHSRGVYHRDLKPENLLLDDDGNLKVTDFGLSAFADHLRQDGLLHTTC
GTPAYVAPEVIGKKGYDGAKADIWSCGVILYVLLAGFLPFQDDNIVSLYRKIYRGDFKCP
PWFSPESRRLITKLLDPNPSTRITAAKIMESSFFRKTIPRSVSRAKDEESVIMEEKPKTE
TLNAFHIISLSEGFDLSPLFKEKRREEKEELRFATAGPASSVISRLEEVAARAAGKFSVR
RSGDTSVRLQGEENGRKGKLAIAADIFALTPSFLVVEVKKSSGDTLEYNQFCSEELRPAL
KDIVWTSTVTQNSTPA
>AvCIPK38 | Symbols: R_transcript_85358
MASRSSGSGGRTRVGRYELGRTLGEGTFGKVKFARNVESEEIVAIKILDKEKILKHKMIS
QVMASKTKIYIVLEFVTGGELFDKIVTKGRLKEDEARKYFQQLINAVDYCHSRGVFHRDL
KPENLLLDANGVLKVSDFGLSALPQQVREDGLLHTTCGTPNYVAPEVINNKGYDGAKADL
WSCGVILFVLVAGYLPFEESNLMALYKKIFKADFTCPSWLSSSAKKLIKRILDPSPMTRI
TIAELIENEWFKKGYKPPTFEQADVSLDDVDGIFDESGDTHNLVVERREERATPVSMNAF
ELISKSQGLNLSSLFEKQMGLVKRETRFTSKCPAKEIISKIEEAAAPLGFDVKKYNYKLK
LQGEKTGRKGHLSVATEVFEVAPSLCMVELRKAGGDTLEFHKFYKNLATGLKDIVWKSVD
ETKEEANDGVGIVSS
>AvCIPK39 | Symbols: R_transcript_88112
MAMERPAPPRSSAATTTTTNNGIILGKYRLGRLLGRGSFAKVYQAQSLSNDTTVAIKVID
KAKTVDASMEPRIVREIAAMRRLSHHSNILQIHEVMATKTKIYLVMDLAAGGDLSSALAR
RRRRHLPESAARRYFQQLVSALHFCHRQGVAHRDIKPQNLLLDSAGTLKISDFGLAALPE
NRENLLHTACGTPAFAAPEVVRRGGGYDGAKADAWSCGVILFLFLAGNLPFDDSNLASMF
QKICRREFQFPDWISKQSKFIIYRLLDPNPNSRMTLETLIDHSWFKKSLQLDPSAQNPPP
QFSKLQAQAKRQTMNAFDIISMSSGLDLSGLFEPSSTRERERRFTAKATEAAVEERVGEV
GERLGYRVDREKDRKSVGLLKGRVVLEFEIMVVAEGLVMVVVTVGGGGFEEVNWDDLRVG
FGDIALDWHNEGS
>AvCIPK40 | Symbols: R_transcript_89489
MEKFTSVRICNYKRISTCKSNMSQPKIKRRVGIYDVGRTIGEGTFAKVKFARNSETGESV
ALKILDKEKVLKHKMAEQIKREVATMKLIKHPNVVRLYEVMGSKTKIFIVLEFVNGGELF
DKIVNHGRMREDEARRYFQQLINAVDYCHSRGVYHRDLKPENLLLDAYGNLKVSDFGLSA
LSQQVRDDGLLHTTCGTPNYVAPEVLNDRGYDGATADLWSCGVILFVLLAGYLPFDDSNL
MNLYKKISAAEFTCPPWLSFGAMKLIAQILDPNPMTRITIPELLVDEWFKKGYKPPVFEE
KEDTNLDDVEAVFRDSEEHHVTEKKEEQPVAMNAFELISMSKGLNLGNLFDVEQGFKRET
RFTSKCPANEIVSKIEEAAKPLGFDVHKKNYKLRLENVKAGRKGNLNIATEVFQVAPSLH
MVEVRKAKGDTLEFHKFYKNLSTCLEDVVWKTEEDMQEMK
>AvCIPK41 | Symbols: R_transcript_96602
GVGGKEGEERNKGMRLGKYEIGRTLGEGNFGKVKFAKNLESGQSFAVKILEKTRILDLNI
TDQIKREIGTLKLLKHPNVVRLHEVLASKTKIYMVLECVTGGELFDRIASKGRLSEAQGR
KLFQQLIDGVCYCHNKGVYHRDLKLENVLVDAKGNIKITDFGLSALPQHFRDDGLLHTTC
GSPNYVAPEILANRGYDGATSDTWSCGVILYVILTGYLPFDDRNLAVLYQKIFKGDAQIP
KWLAPGAQNLIRRILDPNPATRITMAEIKIDEWFKQGYSPANPDDEEESVHIEDEGFWSH
ESSETEENPDSATLINAFQLIGMSSCLDLSGFFEKEDVSERKIRFTSNHSPKELLERIED
IVTQMGFRVQKKNGQLKAMQENKGKKSPGSLSVAAEVLEISPSLYVVELRKSYGDSTVYR
QLCNKLSNDLGNDLSVSPGQGRLMAMDV
>AvCIPK42 | Symbols: R_transcript_9920
MSSRSGGSGIGGGGRTRVGRYELGRTLGEGTFAKVKFARNVESEENVAIKILDKEKILKH
KMISQIKREISTMKLIRHPNVIRMFEVMASKTKIYIVLEFVTGGELFDKIASKGRLKEDE
ARRYFQQLINAVDYCHSRGVFHRDLKPENLLLDANGVLKVSDFGLSALPQQVREDGLLHT
TCGTPNYVAPEVINNKGYDGAKADLWSCGVILFVLMAGYLPFEESNLMALYKKIFKADFT
CPSWFSSSAKKLIKRILDPNPMTRITIAELIENEWFKKGYKPPTFEQADVSLDDVDAIFD
ESGDTQNLVVERREERATAVFMNAFELISKSEGLNLSSLFEKQMGLVKRETRFTSKCPAN
EIISKIKEAAAPLGFDVKKNNHKLKLQGEKTGRKGHLSVATEVFEVAPSLCMVELRKAGG
DTLEFHKVWF
>AvCIPK1 | Symbols: R_transcript_100278
ATGAGTCAGCCAAAAATTAAGCGTCGAGTCGGTATATATGACGTGGGAAGGACAATAGGC
GAGGGTACGTTTGCAAAAGTGAAATTTGCAAGGAATTCCGAGACTGGGGAATCAGTTGCT
CTCAAGATTCTTGACAAGGAGAAAGTTCTTAAACACAAAATGGCCGAACAGATAAAGCGG
GAAGTAGCGACAATGAAGTTGATAAAGCATCCAAATGTTGTTCGCTTATACGAGGTAATG
GGGAGCAAGACCAAGATATTTATTGTTTTGGAGTTTGTAAATGGGGGAGAATTGTTTGAC
AAAATTGTAAACCATGGGCGAATGAGAGAAGATGAAGCACGGAGGTATTTTCAGCAGCTT
ATCAATGCTGTTGATTATTGTCATAGCAGGGGAGTCTATCACAGGGATCTGAAGGATGAT
GGGTTGCTTCATACTACATGCGGAACACCAAACTATGTCGCTCCTGAGGTCCTCAATGAC
CGAGGCTATGATGGGGCAACTGCAGACTTGTGGTCCTGTGGGGTCATACTCTTTGTATTG
CTTGCAGGTTACTTGCCTTTTGATGATTCTAATCTTATGAACCTGTATAAAAAAATTTCA
GCCGCTGAGTTTACTTGCCCCCCCTGGCTCTCTTTTGGGGCCATGAAATTGATCGCTCAA
ATCTTGGATCCCAACCCTATGACTCGCATCACTATACCCGAACTTCTGGTAGATGAATGG
TTTAAAAAAGGTTATAAGCCACCGGTTTTTGAGGAGAAGGAAGATACAAATTTGGATGAT
GTCGAAGCTGTTTTTAGGGACTCGGAAGAACATCACGTGACAGAGAAGAAGGAAGAACAG
CCGGTGGCCATGAACGCATTCGAGTTAATTTCTATGTCCAAAGGGCTCAACCTTGGGAAT
TTGTTTGATGTAGAGCAGGGATTTAAGAGGGAAACGAGGTTCACGTCTAAATGTCCAGCT
AACGAGATAGTCAGCAAGATTGAAGAAGCTGCTAAACCTCTTGGTTTTGATGTTCACAAG
AAAAACTACAAGCTGAGACTTGAAAATGTGAAAGCTGGGAGAAAAGGAAACCTTAACATT
GCTACTGAGGTATTCCAAGTGGCACCCTCTCTTCATATGGTTGAGGTGCGAAAAGCAAAA
GGTGACACTTTGGAATTCCACAAGTTCTATAAGAATCTTTCAACCTGCCTCGAGGACGTG
GTTTGGAAAACAGAGGAGGACATGCAAGAAATGAAGTGA
>AvCIPK2 | Symbols: R_transcript_12876
ATGGATAATAGAGGTACCGTGTTGATGGAAAGATATGAATTAGGGAGATTACTTGGCCAA
GGAACCTTTGCTAAGGTTTACTATGCGAGAAATGTCCAAGCAGGCCAAAGTGTCGCCATT
AAGGTGATAGATAAGGAAAAGATTTTGCGAGTTGGGCACATAGATCAGATTAAACGAGAA
ATATCTATTATGAGACTGGTCAGGCACCCTAATATTGTGCAGATTTTTGAAGTCATGGCC
ACCAAAACCAAGATTTATTTTGTCATGGAATATGCTAAAGGAGGTGAACTTTTCAACAAG
GTGGCTAAAGGAAAGCTGAAGGAGGAAGTTGCTCGAAAATATTTTCAACAGTTGATCAAC
GCTGTTGACTTCTGCCACAGTAGGGGTGTATATCACCGGGATCTGAAGCCTGAAAATTTA
CTCCTAGATGAGAATGAGAATCTGAAGGTTTCTGATTTTGGATTAAGTGCGCTAGCTGAG
TCGAAGCACCAAGACGGGCTTCTTCACACCACTTGTGGGACACCTGCCTATGTTGCACCT
GAGGTTATTAACAGAAGAGGATATGATGGAGAAAAAGCTGATGTTTGGTCTTGTGGGGTG
ATCTTATTTGTTCTGTTGGCTGGGTATCTCCCGTTTCATGATTCAAACTTGATGGAGATG
TACAGGAAGATTGGCAAAGCGGAGTATAAATGCCCGAATTGGTTTCCAGCAGAGGTACGA
AAGCTATTGTTAAGGATATTGGATCCAAATCCTAATACTAGAATCTCTATTGCCAAAATT
AAGGAAACTTCGTGGTTTAAAAAGGGATTGAACTCCAAACTGACAAAAATCAAGACAGAA
AACACGGAGAATGTGTTTCCAAATGCAGATGTAGCTTCTGGTCCCTGTGCGACTAGTAGT
ACAGCTGCTGAGGAAAAGCAAGAACTACTGAGAGCTGCGAACCTAAATGCTTTTGACATC
ATCTCCCTTTCTGCTGGTTTTGATCTGTCCGGCTTGTTTGAAGAGCCTCGTCTAAAGAAA
GAAGCGAGATTTACGTCCAGGCAACCTGCCTCAGTTATTCTATCGAAGCTGGAGGAAATT
GCCAAGCATTTGAAGCTGAGGGTGAGGAAGAAGGAAGCTGGGTTGGTGAAATTTGAGGGA
CTGAAGGAAGGTAGAAAGGGGATCTTATCCATTGATGCAGAGATCTTTGAAGTCACTCCA
TCCTTTCATTTGGTGGAGTTGAAGAAATCTGATGGAGACACACTGGAATATCAGAAGGTA
TTGAACGAGGGTATGCGACCTGCTCTCCAAGATATTGTGTGGGTTTGGCAAGGTGAGCAG
CAGCAGCCACCACTTGAACTGCATTCAGAACCAGTCCCACAGCAGCTGCCACAATCGTCA
CAACAACAACTACAACAGCAGCAGCTGCAGGAGCTGTTACCTTCATCATGA
>AvCIPK3 | Symbols: R_transcript_13797
ATGGCTGACCATAAGGGTAGCGAGAAATCGCAACCGCACTGCGTACTCCACGGGAAGTAC
GAGCTGGGGCGGCTGTTGGGCCACGGCACGTTCGCGAAGGTATACCGCGCGCGGCACCTG
GTGACGGGGAACAACGTGGCGATGAAGGTGGTCGGAAAGGAGAAGGTCATGAAGGTTGGC
ATGACGGAGCAGGTGAAGAGAGAGATCTCAGTCATGAAGATGGTGCAGCACCCGAACATC
GTCGAGCTTCACGAAGTTATGGCGAGCAAGACGAAGATCTACTTCGCGATGGAGCTCGTG
CGCGGCGGCGAGCTGTTCTCGAAGGTCGCCAAGGGGCGGCTGCGGGAGGACGCCGCCAGG
AACTACTTCCAGCAGCTCATATCAGCCGTCGACTTCTGCCACAGCCGCGGCGTCTACCAC
CGCGACCTCAAGCCGGAAAACCTCCTCCTCGACGACGACGGGAACCTGAAGGTGACCGAT
TTCGGTCTCTCGGCGTTTGCCGATCACCTGAGGCAGGACGGGCTCCTTCACACCACCTGT
GGGACGCCGGCGTACGTGGCACCGGAGGTGATCGGAAAAAAAGGCTACGACGGCTCTAAG
GCGGACATTTGGTCTTGTGGTGTCATTCTCTATGTTTTGTTAGCTGGATTTTTACCGTTT
CAGGAGGATAACATTGTATCTCTGTACCGGAAGATTTACCGGGGCGACTTCAAGTGTCCG
CCCTGGTTCTCGCCGGAGTCGAGGCGATTGATAACGAAATTGCTAGATCCGAATCCGAGC
ACTCGCATCACGGCCGCTAAGATCATGGAATCGTCGTTCTTCAGGAAGACGATTCCGAGA
TCTGTGAGCAGAGCCAAAGACGAGGAAAGTGTGACTATGGAAGAGAAGCCGAAAGCAGAG
ACGCTGAACGCGTTCCATATAATCTCGTTGTCGGAAGGGTTCGATCTGTCGCCGCTGTTC
GAGGAGAAGAGGAGGGAGGAGAAGGAGGAGCTGAGGTTCGCGACAGCGGGGCCCGCGAGC
AGCGTGATATCGCTGCTAGAGGAGGTGGCTGCCACGGCGGCGGGAAAGTTCAGCGTGAGG
AGGAGTGGCGACACCAGCGTGCGGCTGCAGGGGGAGGAGAACGGACGCATGGGGAAACTG
GCCATTGCCGTGGACATCTTTGCCTTGACGCCGTCGTTCCTGGTGGTGGAGGTCAAGAAG
TCGAGCGGCGACACCCTAGAGTACAACCAGTTCTGCAGCAAGGAGCTCCGGCCGGCGCTC
AAAGACATCTTGTGGACTTCGCCGGTGACGCAGAATTGTACGCCGGTTTGA
>AvCIPK4 | Symbols: R_transcript_13926
ATGACTGACCATAAGGGTAGCGAGAAATCGCAACCGCACTGCGTACTCCACGGGAAGTAC
GAGCTGGGGCGGTTGTTGGGCCATGGCACGTTCGCGAAGGTATACCGCGCGCGGCACCTG
GTGACGGGGAACAGCGTGGCGATGAAGGTGGTCGGAAAGGAGAAGGTCATGAAGGTCGGC
ATGACGGAGCAGGTGAAGAGAGAGATCTCGGTGATGAAGATGGTGCAGCACCCGAACATC
GTCGAGCTTCACGAAGTTATGGCGAGCAAGACGAAGATCTACTTCGCGATGGAGCTCGTG
CGCGGCGGTGAGCTGTTCTCGAAGGTCGCCAAGGGGCGGCTGCGGGAGGACGCCGCCAGG
AACTACTTCCAGCAGCTCATATCCGCCGTGGACTTCTGCCACAGCCGCGGCGTCTACCAC
CGCGACCTCAAGCCGGAAAATCTCCTCCTCGACGACGACGGGAACCTGAAGGTGACCGAT
TTCGGTCTCTCGGCGTTTGCCGACCACCTGAGGCAGGACGGGCTCCTCCATACCACCTGT
GGGACGCCGGCGTACGTGGCACCGGAGGTGATCGGGAAAAAAGGCTACGACGGCGCTAAG
GCGGACATTTGGTCTTGTGGTGTCATTCTCTATGTTTTGTTAGCTGGATTTTTGCCGTTT
CAGGAGGATAACATTGTGTCTCTGTACCGGAAAATTTACCGGGGCGACTTCAAGTGTCCG
CCCTGGTTCTCGCCGGAGTCGAGGCGGTTGATAACGAAATTGCTAGATCCGAATCCGAGC
ACTCGCATCACGGCCGCTAAGATCATGGAATCGTCGTTCTTCAGGAAGACGATTCCGAGA
TCTGTGAGCAGAGCCAAAGACGAGGAAAGTGTGATTATGGAAGAGAAGCCGAAAACAGAG
ACGCTGAACGCGTTCCATATAATCTCGTTGTCGGAGGGGTTCGATCTGTCGCCGCTGTTC
GAGGAGAAGAGGAGGGAGGAGAAGGAAGAGCTGAGGTTCGCGACAGCGGGGCCCGCGAGC
AGCGTGATATCGCTGCTAGAGGAGGTGGCGGCCACGGCGGCGGGAAAGTTCAGCGTGAGG
AGGAGCGGCGACACCAGCGTGCGGCTGCAGGGGGAGGAGAACGGCCGCATGGGGAAGCTG
GCCATTGCCGTGGACATCTTCGCCTTGACGCCGTCGTTCCTGGTGGTGGAGGTCAAGAAG
TCAAGCGGCGACACCCTGGAGTACAACCAGTTCTGCAGCAAGGAGCTCCGGCCGGCGCTC
AAAGACATCTTGTGGACTTCGCCGGTGACGCAGAATTGTACTCCGGTTTGA
>AvCIPK5 | Symbols: R_transcript_14605
ATGAACGCGAAGCGCACTCGTGTAGGGAGGTACGAGATCGGTAAAACCCTGGGTGAGGGT
AGCTTTGCCAAGGTCAAGTTTGCGAAGAACATCGACACCGATGACTTCGTTGCCATTAAA
ATCATCGACCGTGACCGTGTTCTCCATCACAGAATGGTCGAACAGATTAAAAGAGAAATT
TCAACAATGAAGCTGATCAAGCATCCAAATGTTTTGAAGCTCATCGAGGTTATGGCAAGC
AAGACGAAGATCTACATTGTGCTTGAGTATGTTGATGGGGGTGAGCTTTTTGACAAAATA
GCCAAACAAGGAAGACTCAAGGAAGATGAAGCTAGGAGATATTTTCAGCAGCTTATTAAT
GCTGTAGACTATTGTCACAGCAGAGGCGTGTACCATAGAGACTTAAAGCCAGAGAATCTG
CTTCTGGATTCATTTGGTGTTCTTAAAGTTTCAGACTTTGGATTGAGTGCATTTTCCCAG
CAAGTACGAGAAGATGGATTGCTTCACACTGCCTGTGGAACCCCAAATTATGTAGCTCCT
GAGGTGCTCAATGATAAAGGTTACGATGGTACATCAGCTGATATATGGTCTTGTGGGGTC
ATTCTGTTTGTTCTTATGGCTGGATACTTACCTTTTGATGAGCCAAACCTCATGGCTTTA
TATAGGAGAATCCACAAGGCTGATTTCTCATGTCCGTCATGGTTTACATCGGGTGCAAAA
AAACTGATTAAGCGTATTATTGACCCTAATCCACTCACCCGAATAACAATTCCAGAAATC
TTAGAAAATGATTGGTTCAAGAAAGGTTACAAGCCACCACAGTTCGAACAGGGAGAGGAT
GTGAATCTTGATGATGTGGATGCTGTTTTTAATGACTCGGAGGAACACCTTGTAACAGAA
AAGAAAGAGAAGCCTGTATCCATGAATGCTTTCGAGCTTATTTCCAGGTCACAGGGTTTC
AGTCTTGAAAACTTGTTTGAAAAGCAGATGGGTCTTGTTAAGCGAGAGACACGCTTTACT
TCCAAGTACCCTGCTAATGAGATTATGTCAAAAATAGAGGAAGCTGCAAAACCTTTGGGT
TTCAATGTTCACAAGCGAAACTACAAGATGAAGTTACAAGGTGATAAGACAGGAAGGAAA
GGCCACCTATCAGTAGCCACAGAGGTATTTGAAGTAGCTCCATCTCTACACATGGTGGAA
CTCCGGAAAACAGGCGGTGACACACTGGAGTTTCACAAGTTTTACAAGACCTTCTCGTCT
GGATTGAAAGATATTGTGTGGAACTCTGAATCAATTGCTGAAGAAACAAGGTCCTGA
>AvCIPK6 | Symbols: R_transcript_14995
ATGAACAACAACGCCTTATTCGGTAAGTATGAGCTCGGAAGGCTCCTCGGATGCGGCGCC
TTCGCCAAGGTCTATCACGCAAGAAACATTGCCACGGGACAGAGCGTCGCCGTGAAGGTC
ATCAGCAAGAACAAAATCGCCGGGACGAACTTAATGTCGAATGTCAAGCGCGAGATCGCT
ATCATGCGCCGGCTGCGCCACCCGCACATCGTGAAGCTCTTCGAGGTCCTGGCTACCAAG
ACCAAGATCTACTTCGTGATGGAGTTCGTCAAGGGAGGCGAGCTCTTCGCAAAGGTCGCC
AAGGGCCGGTTCTCGGAGGATCTCAGCCGCAAGTACTTCCACCAATTGATCTCCGCCGTA
GGGTTCTGCCACTCACGCGGCGTCTTCCATCGAGATCTGAAGCCGGAAAACCTCCTACTC
GACGAGAACGGCGATCTGAAGGTCTCCGATTTCGGGCTTAGCGCCGTCAACGATCAGATC
CGGCTCGACGGTTTGTTACACACGTTGTGCGGCACGCCTGCCTACGTGGCGCCCGAGATT
CTCGCGAAGAAAGGATACGATGGTGCGAAGGTGGATGTGTGGTCATGCGGAGTCATCCTC
TTCGTGCTAACGGCGGGATATCTACCGTTCAACGACCCCAACCTCATGATGATGTACAAG
AAGATCTACAAAGGAGAGTTCCGTTGCCCCAAATGGATGTCGTCAGATCTCAGACGGTTC
CTCTCGCGCCTCCTTGACACGAACCCCGAGACGAGGATTACCGTCGATGAGATCGTACGG
CACCCGTGGTTCAAGAAAGATTGCAAGGAAATCAACTTCTATTATGAGGAAGAATTTGAC
AAGGCGGCCGAGAAAGAAGAGAAAAATGCGTTGGCTCTGAACGCGTTCGATTTGATATCG
TTCTCGCCCGGGTTGAATCTTTCCGGTTTGTTCGACGACTCGGCCAACTCGTCCGACCAC
GGCGAGAGGTTCGTGTTGGCGGAGTCACCGGAGAGAATCATCCAGAAGGTTGAAGAGGTC
GTAAAGGGTGAGAGGGTTGTGAGGTTGAGGAAGAAGAAGGAATGGGGAATCGAATTGGAA
GGGCTTCATGGTAATTTCGTTCTCGGACTGGAGATTTACCGGTTGACCGACAGTTTGGTT
GTTGTGGAGGCTTCGCAGAAAGGTGGGAGTGCCGGTGGTTTGTTCAACGACTTGTGGAAG
AATAAAATCAAGCCGGCGTTCATTTCCTCACCCGAAGCTCCGGTTCCCTGTGGCTGA
>AvCIPK7 | Symbols: R_transcript_15110
ATGAACGCGACCCGCACTCGTGTAGGGAGGTACGAGATCGGTAAAACCCTGGGTGAGGGT
AGCTTTGCCAAGGTCAAGTTTGCGAAGAACATCGACACCGGTGACTTCGTCGCCATTAAA
ATCATCGACCGTGACCGTGTTCTCCATCACAGAATGGTCGAACAGATTAAAAGGGAAATA
TCAACAATGAAGCTGATCAAGCATCCAAATGTTTTGAAGCTCTTCGAGGTTATGGCAAGC
AAGACGAAGATCTACATTGTGCTTGAGTATGTTGATGGGGGTGAGCTTTTTGACAAAATA
GCCAAACAAGGAAGACTGAAGGAAGATGAAGCTAGGAGATATTTTCAGCAGCTTATTAAT
GCTGTAGACTATTGTCACAGTAGAGGCGTGTACCATAGAGACTTAAAGCCAGAGAATCTG
CTTCTAGATTCATTTGGTGTTCTTAAAGTTTCGGACTTTGGATTGAGTGCATTTTCCCAG
CAAGTACGAGAAGACGGATTGCTTCACACTGCCTGTGGAACCCCAAATTATGTAGCTCCT
GAGGTGCTCAATGATAAAGGTTACGATGGTACATCAGCTGATATATGGTCTTGTGGGGTC
ATTCTGTTTGTTCTTATGGCAGGATACTTACCTTTTGATGAGCCAAACCTCATGGCTTTA
TATAGGAGAATCCACAAGGCTGATTTCTCATGTCCACCATGGTTTACATCGGGTGCAAAA
AAACTGATTAAGCGTATTATTGACCCTAATCCACTCACCCGAATAACAATTCCAGAAATC
TTAGAAAATGATTGGTTCAAGATAGGTTACAAGCCATCACAGTTCGAACAGGGAGATGAT
GTGAATCTTGATGATGTAGATGCTGTTTTTAATGACTCAGAGGAACACCTTGTAACAGAA
AAGAAAGAGAAGCCTGTATCCATGAATGCTTTCGAGCTTATTTCCAGGTCACAGGGTTTC
AGTCTTGAAAACTTGTTTGAAAAGCAGATGGGTCTTGTTAAGCGAGAGACACGCTTTACT
TCCAAGTGCCCTGCTAATGAGATTATGTCGAAAATAGAGGAAGCTGCAAAACCTTTGGGT
TTCAATGTTCACAAGCGAAACTACAAGATGAAGTTACAAGGTGATAAGACAGGAAGGAAA
GGCCACCTATCAGTAGCCACAGAGGTATTTGAAGTAGCTCCGTCTCTACACATGGTGGAG
CTCCGGAAAACAGGTGGTGACACACTGGAGTTTCACAAGTTTTACAAGACCTTCTCGTCT
GGATTGAAAGATATTGTGTGGAACTCTGAATCAATTGCTGAAGAAACAAGGTCTTGA
>AvCIPK8 | Symbols: R_transcript_15163
ATGGTGGTGAGGAAGGTAGGGAAGTACGAAGTGGGGAGGACGATCGGAGAAGGAACCTTC
GCGAAGGTGAAGTTCGCTCAGAACACGGAGACTGGTGAGAGTGTCGCCATGAAAGTTCTG
GATCGCACCACCATACTCAAGCACAAGATGGTCGATCAGATTAAGAGGGAGATATCTATA
ATGAAGCTTGTCAGACATCCAAATGTTGTTCGTCTGCACGAGGTTCTGGCGAGTCGCACG
AAGATCTATATAATCTTGGAATTTATTACAGGTGGCGAATTATTTGATAAAATAGTTCAC
CATGGAAGACTCAGTGAAGCTGACTCGAGGAGATTCTTCCAACAACTCATTGATGGTGTG
GATTATTGCCATAGCAAGGGAGTCTACCACAGAGATCTGAAGCCTGAAAATCTTTTACTG
GATTCTGAAGGAAATCTCAAAATTTCGGATTTTGGGCTTAGTGCCTTGCCTGGAGAAGGA
GTCAGCCTCCTTCGAACGACTTGCGGGACTCCTAACTATGTTGCACCTGAGGTACTCGGT
CACAAGGGCTATGATGGTGCTGTTGCTGATGTTTGGTCCTGTGGGGTCATTCTATATGTT
CTGATGGCAGGATATCTTCCATTTGATGAAATTGATCTCACCACATTGTATAGTAAGATA
GACAAAGCAGAGTTTTCGTGTCCGTCATGGTTTCCAGTAGGAGCAAAATCTTTAATTCAT
CGAATTTTAGATCCAAATCCTGAAACTCGTATTCGGATTGAAGAGATAAGGAGTGATGAG
TGGTTTAAGAGGAGTTATGTTCCTGTCAAACTTATTGAATATGAAGATGTTAACCTGGAT
GATGTTAATGCTGTTTTTGACGATCCCGAGGAAGAACAGGTTGATGAGAAGGGCAGGAAT
GAGCATTTGGGTCCTCTGACTCTTAATGCATTCGATCTAATTATTCTCTCTGAAGGTCTA
AACCTTTCGTCACTGTTTGATCGTCGGCAGGACTCTGCGAATCATCAAACACGCTTTGTT
TGTCAGAAACCAGCACAGGTGGTTTTATCAACAATGGAAGTTGTTGCACAATCAATGGGT
TTTAAGACCCATATACGTAATTATAAGATGAGAGTGGAAGGCCTTTCAGCAAACAAGACA
TCGCATTTCTCGGTCATTTTGGAAGTATTTGAAGTTGCTCCTACATTCCTGATGGTCGAC
ATGCAGAAAGCAGCTGGAGATGCTGGTGAATACCTCAAGTTTTACAAGAATTTTTGTGAC
AATCTTGAGGATATCATCTGGAGGCCGTCCAACGAACCGTGCAAATCAAGGGTTACCAAG
ACTAAGAGCAAAAGGCGATAA
>AvCIPK9 | Symbols: R_transcript_15368
ATGAAAGAGATCGAACATGCCACCACCACGTCACCGCTGGCGACAGTAGTCGCAACAATG
GCAACGAAAATGGACAACAAAGCCTTATTCGGCAAGTATGAGCTCGGAAGGCTCCTTGGA
TGCGGCGCATTCGCCAAGGTCTACCATGCCAGAAACATTGTCACCGGCCAAAACGTCGCT
GTCAAGGTCATCAGCAAGAACAAAATCACCGGCACGAATTTGATGTCAAATGTCAAGAGA
GAGATCGCTATCATGCGCCGGTTGCGCCACCCGCATATCGTGAAGCTCTTCGAGGTCCTG
GCCACCAAGACCAAGATCTACTTCGTGATGGAGTTCGTCAAGGGTGGCGAGCTATTCGCG
AAGGTCGCCAAGGGCCGGTTCTCGGAGGATCTCAGCCGCAAGTACTTCCACCAATTGATC
TCCGCTGTCGGGTATTGCCACGCCCGCGGCGTCTTCCACCGAGATCTGAAGCCGGAAAAC
CTCCTCCTCGACGAGAACGACGACCTGAAGGTCTCCGATTTCGGGCTCAGCGCCGTCACC
GATCAGATCCGGCATGACGGTTTGTTGCACACGCTGTGTGGCACGCCTGCCTACGTGGCG
CCCGAGATTCTCGCGAAGAAAGGATACGATGGTGCGAAGGCGGATGTGTGGTCCTCCGGA
GTCGTCCTGTTTGTGCTAACGGCAGGTTATCTACCGTTCAATGACCCCAACCTGATGATG
ATGTACAAAAAGATCTACAAAGGAGAGTTCCGTTGCCCCAAATGGATGTCGTCAGATCTC
AAACGGTTCCTCTCACGCCTCCTCGACACGAACCCCGCGACGAGGATCACCGTCGATGAG
ATCGTACGGCATCCGTGGTTCAAGAAAGATTGTAAAGAAATCAACTTCTATTATGAGGAG
GAATTAGACAAGGCCGAGAAAGAAGAGAAAAACGGTTTGGCTCTGAACGCGTTCGATTTG
ATCTCGTTCTCGTCCGGGTTGAACCTATCCGGGTTGTTCGACGACTCGGCCAACTCGTCC
GGCGACTGCGACCGGTTTGTGTCGGTCGAGTCACCGGACAGAGTCATCAAGAAGGTTGAG
GAGGCCGTAAAGGGTGAGAAGGTTGTGAGGTTGAGGAAGAAGAAGCAATGGGGAATCGAA
TTGGAAGGGCTTAATGGTAATTTCGTTATTGAACTGGAGGTTCACCCGTTGACTGACAGT
TTGGTACTTGTGGAGGCTACGCGGAGAGGTGGGAGTACCGGTTTGTTCAACGACGTGTGG
AAGAATAAAATCAAGCCGGGGCTTATTTTCTCACAGGAAGAGCCGGTTCCCGGTAGCTAA
>AvCIPK10 | Symbols: R_transcript_15514
ATGCGAAGGAATATCATTGGAGGAGTAATGCCGGTGATTGAAGATGAGGTAGGCAATGTT
TTGCCGCCGGCCGGCGATATCCCGGCGGATTCTGTGAAAACCCTGTTCGGAAAGTACGAG
GTAGGGAAGCTTCTCGGCTACGGAGCCTTCGCGAAGGTGTACCACGGCAGGGACGTGAGG
ACTGGACAGAGCGTGGCCATTAAGGCGGTGAGTAAACAGAAAGTGCTCAGAGGGGGGTCC
ACGGCAAACGTTAAGCGGGAGATCTCTATCATGCGCCGGATGCGCCACCAGCACATCGTG
CGCCTCCTCGAGGTCATGGCCACGAAGACGAAGATCTACTTCGTTCTCGAGTTTGCCAAG
GGCGGCGAGCTCTTCGCCAAGGTCGCCAAGGGCCGTTTCAGCGAAGATCTCAGCCGCCGG
TACTTCCAGCAGTTGATCTCCGCCATCGGATACTGCCACTCCCATGGCGTCTTCCACCGC
GATCTGAAGCCAGAAAACCTCCTCCTCGACGAGAATTGGGACCTCAAAGTCACCGATTTT
GGCCTCAGCGCCGTCAAGGACCAGATCCGAGCGGACGGACTCCTCCACACCTTGTGCGGG
ACCCCTGCCTACGTGGCGCCGGAGATCCTCGCGAAGAAGGGATACGACGGTGCGAAGGTC
GACGTCTGGTCGTGCGGCGTCATCCTCTACGTGTTGAACGCCGGTTTTCTACCGTTCAAC
GATCCGAATCTGATGGTGATGTACCGGAAAATCTACAAAGGTGAGTTTCGTTGCCCTAAG
TGGACTTCTCCAGATCTGAAGCGGTTCTTGTCTCGCCTCCTCGACACGAATCCGGATACC
CGCATCACCGTCGACGAGATGGTCAACGATCCATGGTTCAAAAAGGGCTACAAAGAGATC
AAATTCCACTCCGAAGATTTCGAGATCAAGGAAAACGGCGACAGCGGAAAGTTCTTAAAC
GCTTTTGACATAATCTCGTTCTCATCCGGTATTGATCTGTCCAGTCTGTTCAACGAACCG
GAGGTTTCCGCCGTCGGTGAGCGGTTCTTGTCGGCGGAGTCGCCGGAGAGAGTTATCGAG
AAGGTAGAAGAGGTGGCGAAGGCGGAGGGGTTGACTGTGACGAGGAAGAAGGATCTGGGG
GTAAAATTGGAAGGGCAAAATAGTAATTTCGTTGCGTTGGTGGAGGTTCACCGGTTAACG
GAGAAGCTGGTTGTGGTTGAGGTTAAGAGGAGAGAGAGCGAAGCAGGACCTAGCCGTGAA
ATTTGGAAAGATAAACTCAGGCCCCAGTTGAGCTCTATCGTTTACCAACCGGAACGGTAA
>AvCIPK11 | Symbols: R_transcript_15669
ATGCAAGAGATCGAACATGCCACCACCGCATCACTGCCGGCGACAGTAGCCACAACATCG
GCAACGAAAATGAACAACAACGCCTTATTCGGTAAGTATGAGCTCGGAAGGCTCCTCGGA
TGCGGCGCCTTCGCCAAGGTCTATCACGCAAGAAACATTGCCACGGGACAGAGCGTCGCC
GTGAAGGTCATCAGCAAGAACAAAATCGCCGGGACGAACTTAATATCGAATGTCAAGCGC
GAGATCGCTATCATGCGCCGGTTGCGCCACCCGCACATCGTGAAGCTCTTCGAGGTCCTG
GCCACCAAGACCAAGATCTACTTCGTGATGGAGTTCGTCAAGGGAGGCGAGCTCTTCGCA
AAGGTCGCCAAGGGCCGGTTCTCGGAGGATCTCAGCCGCAAATACTTCCACCAATTGATC
TCCGCCGTAGGGTTCTGCCACTCACGCGGCGTCTTCCATCGAGATCTGAAGCCGGAAAAC
CTCCTACTCGACGAGAACGGCGATCTGAAGGTCTCCGATTTCGGGCTTAGCGCCGTCAAC
GATCAGATCCGGCTCGACGGTTTGTTACACACGTTGTGCGGCACGCCTGCCTACGTGGCG
CCCGAGATTCTCGCGAAGAAAGGATACGATGGTGCGAAGGTGGATGTGTGGTCATGCGGA
GTCATCCTCTTCGTGCTAACGGCGGGATATCTACCGTTCAACGACCCCAACCTCATGATG
ATGTACAAGAAGATCTACAAAGGAGAGTTCCGTTGCCCCAAATGGATGTCGTCAGATCTC
AGACGGTTCCTCTCGCGCCTCCTTGACACGAACCCCGAGACGAGGATTACCGTCGATGAG
ATCGTACGGCACCCGTGGTTCAAGAAAGATTGCAAGGAAATCAACTTCTATTATGAGGAA
GAATTTGACAAGGCGGCCGAGAAAGAAGAGAAAAATGCGTTGGCTCTGAACGCGTTCGAT
TTGATATCGTTCTCGCCCGGGTTGAATCTTTCCGGTTTGTTCGACGACTCGGCCAACTCG
TCCGACCACGGCGAGAGGTTCGTGTTGGCGGAGTCACCGGAGAGAATCATCCAGAAGGTT
GAAGAGGTCGTAAAGGGTGAGAGGGTTGTGAGGTTGAGGAAGAAGAAGGAATGGGGAATC
GAATTGGAAGGGCTTCATGGTAATTTCGTTCTCGGACTGGAGATTTACCGGTTGACCGAC
AGTTTGGTTGTTGTGGAGGCTTCGCAGAAAGGTGGGAGTGCCGGTGGTTTGTTCAACGAC
TTGTGGAAGAATAAAATCAAGCCGGCGTTCATTTCCTCACACGAAGCTCCGGTTCCCTGT
GGCTAA
>AvCIPK12 | Symbols: R_transcript_15702
ATGCAAGAGATCGAACATGCCACCACCGCATCACTGCTGGAGACAGTAGCCTCAACATCG
GCAACGAAAATGAACAACAACGCCTTATTCGGCAAGTATGAACTCGGAAGGCTCCTCGGA
TGCGGAGCCTTCGCCAAGGTCTACCACGCCAGAAACATCGCCACCGGCCAGAGCGTCGCC
GTCAAGGTCATCAGCAAGAACAAAATCGCCGGGACGAACTTAATGTCTAATGTCAAGCGC
GAGATCGCTATCATGCGCCGGTTGCGCCACCCGCACATCGTGAAGCTCTTCGAGGTCCTG
GCCACCAAGACCAAGATCTACTTCGTGATGGAGTTCGTCAAGGGCGGCGAGCTCTTCGTA
AAGGTCGCCAAGGGCCGGTTCTCAGAGGATCTCAGCCGCAAGTACTTCCACCAATTGATC
TCCGCCGTCGGGTACTGCCACTCCCGCGGCGTCTTCCATCGAGATCTGAAGCCGGAAAAC
CTCCTACTCGACGAGAACGGCGATCTGAAGGTCTCCGATTTCGGACTCAGCGCCGTCAAC
GATCAGATCCGGCTCGACGGTTTGTTACACACGCTGTGCGGCACGCCTGCCTACGTGGCG
CCAGAGATTCTCGCGAAAAAAGGATACGATGGTGCGAAGGTGGATGTGTGGTCATGCGGA
GTCATCCTCTTCGTGCTAACGGCAGGATATCTACCATTCAACGACCCCAACCTCATGATG
ATGTACAAGAAGATCTACAAAGGAGAGTTCCGTTGCCCCAAATGGATGTCGTCAGATCTC
AGACGGTTCCTCTCACGCCTCCTTGACACGAACCCCGAGACGAGGATCACCGTCGATGAG
ATCGTACGGCACCCGTGGTTCAAGAAAGATTGCAAGGAAATCAACTTCTATTATGAGGAA
GCATTTGACAAGGCCGAGAAAGAAGAGAAAAACGGTTTGGCTCTGAACGCGTTCGATTTG
ATATCGTTCTCGCCCGGGTTGAATCTGTCCGGTTTGTTCGACGACTCGGCCAACTCGTCC
GGCCACGGTGAGAGGTTCTTGTCGGCGGATTCACCGGAGAGAATTATCCAGAAGGTTGAA
GAGGTCGTGAAGGGTGAGAGGGTTGTGAGGTTGAGGAAGAAGAAGGAATGGGGAATCGAA
TTGGAAGGGTTTCATGGTAATTTCGTTCTCGGACTGGAGATTTACCGGTTGACCGACAGT
TTGGTAGTTGTGGAGGCTTCGCGGAAAGGTGATAGTGCCGATTTATTCAACGACGTGTGG
AAGAATAAAATCAAGCCGGCGCTCATTTCCTCACCCGAAGCGCCGGTTCCCGGTGTCTAA
>AvCIPK13 | Symbols: R_transcript_16308
ATGCGAAGGAATATAATGGAAGGAGGAATGCCGGTGATTGGAGATGAGGCCGGAGAGATT
CCGGAGAATTCTGAGAAAAACCTGTTCGGAAAGTACGAGCTAGGGAAGCTTCTCGGCTAC
GGAGCCTTCGCGAAGGTGTACCACGGAAGGGACGTGAGGACTGGGCAGAGCGTGGCCATC
AAGGCGGTAAGTAAACAGAAAGTGCTCAAAGGGGGGCTCGCGGCGCAAGTTAAGAGGGAG
ATCTCTATCATGCGCCGTATGGGCCACCAGCACATCGTGCGCCTCTTCGAGGTCATGGCC
ACGAAGACGAAGATCTACTTCGTTCTCGATTTCGCCAAGGGCGGAGAGCTCTTCGCCAAG
GTTGCCAGGGGCCGGTTCAGCGAGGATCTCAGCCGCCGGTACTTCCAGCAGCTGATCTCC
GCCATCGGTTACTGCCACTCACACGGCGTCTTCCACCGCGATCTGAAGCCGGAAAACCTC
CTCCTCGACGAGAATTGGGACCTCAAAGTCACCGACTTCGGCCTCAGCGCCGTCAAGGAC
CAGATCCGAGCGGACGGATTCCTCCACACCTTGTGCGGGACCCCTGCCTATGTGGCGCCG
GAGATCCTCGCGAAGAATGGCTACGACGGTGCGAAGGTGGACGTCTGGTCGTGCGGCGTC
ATCCTCTACGTGTTGAACGCCGGTTTTCTACCTTTCAACGATCCGAACCTGATGGTGATG
TACCGGAAAATCTACAAAGGTGAGTTCAGTTGCCCTAAGTGGACCTCTCCAGATCTGAAG
CGGTTCTTGTCTCGCCTCCTCGACACGAATCCCGAGACTCGCATCACCGTCGACGAGATT
GTCCACGATCCGTGGTTCAAAAAGGGCTACAAAGAGATCAAATTCCACTCTGAAGATTTC
GAGTTCAAGGACGACGGCGACAGCGGAAAGTTCTTAAACGCTTTTGACATTATCTCGTTC
TCGTCCGGTATTGATCTGTCCGGTCTGTTCAATAACCCGGAAGTTTCCGCATGTGACGAG
CGGTTCTTGTCGCCGGAGTCGCCGGAGAGAGTCATCGGGAAGGTAGAGGAGGTAGCGAAG
GCGGAGGGGTTGACGGTGACTAGGAAGAAGGATTTGGGTGTGAAACTGGAAGGGCATAAT
GGTCATTTCGTTGCGTTGGTGGAGGTTAAACGGTTAACGGAGAAGCTGGTGGTGGTTGAG
GTTAATAGGAGAGAGATTGAGGCTGGACCTAGCCGTGAAATTTGGAAAGATAAACTCAGG
CCCCAGTTGAGTTCTCTTGTTTACCAACCGGAGCGGTAA
>AvCIPK14 | Symbols: R_transcript_16387
ATGACTGACCATAAGGGTAGCGAGAAATCGCAACCGCACTGCGTACTCCACGGGAAGTAC
GAGCTGGGGCGGCTGTTGGGCCACGGCACGTTCGCGAAGGTATACCGCGCGCGGCACCTG
GTGACGGGGAACAGCGTGGCGATGAAGGTGGTCGGAAAGGAGAAGGTCATGAAGGTCGGC
ATGACGGAGCAGGTGAAGAGAGAGATCTCGGTGATGAAGATGGTGCAGCACCCGAACATC
GTCGAGCTTCACGAAGTTATGGCGAGCAAGACGAAGATCTACTTCGCGATGGAGCTCGTG
CGCGGCGGCGAGCTGTTCTCGAAGGTCGCCAAGGGGCGGCTGCGGGAGGACGCCGCCAGG
AACTACTTCCAGCAGCTCATATCAGCCGTCGACTTCTGCCACAGCCGCGGCGTCTACCAC
CGCGACCTCAAGCCGGAAAACCTCCTCCTCGACGACGACGGGAACCTGAAGGTGACCGAT
TTCGGTCTCTCGGCGTTTGCCGACCACCTGAGGCAGGACGGGCTCCTCCATACCACCTGT
GGGACGCCGGCGTACGTGGCACCGGAGGTGATCGGGAAAAAAGGCTACGACGGCGCTAAG
GCGGACATTTGGTCTTGTGGTGTCATTCTCTATGTTTTGTTAGCTGGATTTTTACCGTTT
CAGGAGGATAACATTGTATCTCTGTACCGGAAGATTTACCGGGGCGACTTCAAGTGTCCG
CCCTGGTTCTCGCCGGAGTCGAGGCGGTTGATAACGAAATTGCTAGATCCGAATCCGAGC
ACTCGCATCACGGCCGCTAAGATCATGGAATCGTCGTTCTTCAGGAAGACGATTCCGAGA
TCTGTGAGCAGAGCCAAAGACGAGGAAAGTGTGATTATGGAAGAGAAGCCGAAAGCAGAG
ACGCTGAACGCGTTCCATATAATCTCGTTGTCGGAGGGGTTCGATCTGTCGCCGCTGTTC
GAGGAGAAGAGGAGGGAGGAGAAGGAAGAGCTGAGGTTCGCGACAGCGGGGCCCGCGAGC
AGCGTGATATCGCTGCTAGAGGAGGTGGCTGCCACGGCGGCGGGAAAGTTCAGCGTGAGG
AGGAGCGGCGACACCAGCGTGCGGCTGCAGGGGGAGGAGAACGGCCGCATGGGGAAGCTG
GCCATTGCCGTGGACATCTTCGCCTTGACGCCGTCGTTCCTGGTGGTGGAGGTCAAGAAG
TCGAGCGGCGACACCCTAGAGTACAACCAGTTCTGCAGCAAGGAGCTCCGGCCGGCGCTC
AAAGACATCTTGTGGACTTCGCCGGTGACGCAGAATTGTACTCCGGTTTGA
>AvCIPK15 | Symbols: R_transcript_17112
GGGGTTTGGCCAAATTTGTTGCTCTCTCTACCCCTCTTTCTAAATAGAGCACGTGCCGCC
CCCGGCCGCCCCAACCCCATGGCTCCGCGTTCCTCCGCCGCAACCAGCACCACGACCACC
AATGGGATCATATTGGACAAGTACCGATTGGGCCGGCTTTTGGGACGGGGCAGCTTCGCC
AAGGTCTACCAGGCCCAATCTCTAAGCAACAACACGACGGTGGCTATTAAGGTGATCGAC
AAGGCCAAGACGGTGGACGCCTCCATGGAGCCGCGGATCGTGCGCGAAATCGCCGCCATG
CGCCGCCTCAGCCACCACTCCAACATCCTCCAAATCCACGAGGTCATGGCCACAAAAACC
AAGATCTACCTCGTCATGGATCTCGCCGCCGGCGGTGACCTCTCCACCGCCCTCGCCCGA
CGACGCCTCCCTGAATCCGCCGCTCGCCGCTACTTCCAGCAGCTCGTCTCCGCCCTCCAC
TTCTGCCACCGCCAAGGCGTCGCCCACCGCGACATCAAGCCCCAGAACCTCCTCCTCGAC
TCTGCCGGAACCCTAAAGATCTCTGACTTCGGCCTCGCCGCCCTGCCGGAAAACCGCGAG
AACCTCCTCCACACCGCCTGCGGGACCCCGGCGTTTGCCGCCCCTGAGGTGGTCCGACGC
GGCGGTGGCTACGACGGCGCGAAGGCGGACGCCTGGTCTTGCGGCGTCATTCTCTTTCTC
TTCCTCGCCGGAAACCTCCCCTTCGACGATTCCAATCTCGCCGCCATGTTCAAGAAGATT
TGCCGCCGCGAATTTCAATTCCCCGATTGGATCTCGAAGCAATCGAAATTCATCATCTAT
CGTTTGTTAGATCCAAATCCCAATTCGAGGATGACTTTGGAGACCTTAATCGATCACTCT
TGGTTCAAAAAATCATTGCAATTAGACCCATCTGCGCAAAATCCTCCTCCCCAATTCAGC
AAATTCAAAGTGGAGAGAGAGACTATGAACGCGTTTGATATAATTTCGATGTCATCGGGG
TTGGATTTATCGGGGCTTTTCGAGCCCAGCTCGAGTAGTGAGAGAGAGAGGAGGTTTACG
GCGAAGGCAACGGAGGTGGCGGTTGAGGAGAGAGTTGGGGAGGTGGGAGAGAGATTGGGG
TACAGAGTAGATAGAGAGAAGGGTAGGAGGAGTGTAGGGTTGTTGAAGGGAAGGGTAGTT
TTGGAATTTGAGATTATAGTGGTGGCAGAGGGGTTGGTGATGGTGGTGGTGATGGTGGTT
GGTGGTGGCTTTGAGGAGGTTAATTGGGAGGATTTGAGAGTAGGTTTTGGGGATATAGCT
CTTGATTGGCATAATGAAGGGTCTTGA
>AvCIPK16 | Symbols: R_transcript_22835
ATGGCCATGGAACGGCCGGCCCCACCGCGTTCCTCCGCCGCAACCACCACGACGACCACT
AATGGGATCGTATTGGGCAAGTACCGATTGGGCCGGCTTTTGGGCCGGGGAAGCTTCGCC
AAGGTCTACCTGGCCCAATCTCTAAGCAACAACACGACGGTGGCTATCAAGGTGATCGAC
AAGGCAAAGACGGTGGACGCAGCCATGGAGCCGCGGATCGTGCGCGAAGTCGCAGCCATG
CGCCGCCTCAGTCACCACCCCAACATCCTGCAAATCCACGAGGTCATGGCCACGAAAACC
AAGATCTACCTCGTCATGGACCTCGCCGCAGGCGGAGACCTCTCCACCGCCCTCGCCCGT
CGCCGCTGCCGCCTCCCGGAATCCGGCGCCCGCCGCTACTTCCAACAGCTCGTCTCCGCC
CTCCACTTCTGCCACCGCCAAGGCGTCGTGCACCGCGACGTCAAGCCCCAGAACCTCCTC
CTAGACTCCGACGGAACCCTAAAGATCTCCGACTTCGGCCTCGCCGCCCTGCAGGAAAAC
CGCGAGAACCTCCTCCTCCACACCGCCTGCGGAACCCCGGCGTTCGCCGCTCCGGAGGTG
ATCCGACGCGGTGGTGGCGGCTACGACGGCGCCAAGGCCGACGCCTGGTCGTGTGGTGTC
ATCCTCTTCGTCTTCCTCGCCGGAAACCTCCCCTTCGACGACTCCAACCTCGCCGCCATG
TACCAGAAGATTTGCCGCCGCGAATTTCAATTCCCCGATTGGATCTCGAAGCAATCTAAA
TTCATCATCTATCGTTTGTTAGATCCAAATCCCATTTCGAGAATGACTTTAGAGGCCTTA
ATCGATCACTCTTGGTTCAAAAAATCATTGCAATTAGACCCATCTGAGCAAAATCGACCT
CCCAAATTCTGTAAATTCGAAGCGAAGAGAGAGACAATGAACGCGTTTGATATAATTTCG
ATGTCGTCGGGGTTGGACTTATCGGGGCTTTTTCAACCCAGCTTGAATAGTGAGAGAGAG
AGGAGGTTTACAGCCAAGGCATCGTCGGTGGAGGCGGTTGAGGAGACAGTGGGGGAGGCG
GGAGAGAGATTGGGGTACAAAGTAGATAGAGAGAAGGATAGGAGGACTATAGGGTTGTTG
AAGGGAAGGGTACTTTTGGAATTTGAGATATTGGTGGTGGCGAAGGGGTTGGTGATGGTG
GTAGTGAGGGTGGTTGGTGTTGGCTTTGAGGATGTTAATTGGGAGGATTTGAGAGTTGGG
TTTGGGGATATAGCTCTTGATTGGCATAATGAGGGGTCTTGA
>AvCIPK17 | Symbols: R_transcript_23731
ATGAGTCAGCCAAAAATTAAGCGTCGAGTCGGTATATATGACGTGGGAAGGACAATAGGC
GAGGGTACGTTTGCAAAAGTGAAATTTGCAAGGAATTCCGAGACTGGGGAATCAGTTGCT
CTCAAGATTCTTGACAAGGAGAAAGTTCTTAAACACAAAATGGCCGAACAGATAAAGCGG
GAAGTAGCGACAATGAAGTTGATAAAGCATCCAAATGTTGTTCGCTTATACGAGGTAATG
GGGAGCAAGACCAAGATATTTATTGTTTTGGAGTTTGTAAATGGGGGAGAATTGTTTGAC
AAAATTGTAAACCATGGGCGAATGAGAGAAGATGAAGCACGGAGGTATTTTCAGCAGCTT
ATCAATGCTGTTGATTATTGTCATAGCAGGGGAGTCTATCACAGGGATCTGAAGGATGAT
GGGTTGCTTCATACTACATGCGGAACACCAAACTATGTCGCTCCTGAGGTCCTCAATGAC
CGAGGCTATGATGGGGCAACTGCAGACTTGTGGTCCTGTGGGGTCATACTCTTTGTATTG
CTTGCAGGTTACTTGCCTTTTGATGATTCTAATCTTATGAACCTGTATAAAAAAATTTCA
GCCGCTGAGTTTACTTGCCCCCCCTGGCTCTCTTTTGGGGCCATGAAATTGATCGCTCAA
ATCTTGGATCCCAACCCTATGACTCGCATCACTATACCCGAACTTCTGGTAGATGAATGG
TTTAAAAAAGGTTATAAGCCACCGGTTTTTGAGGAGAAGGAAGATACAAATTTGGATGAT
GTCGAAGCTGTTTTTAGGGACTCGGAAGAACATCACGTGACAGAGAAGAAGGAAGAACAG
CCGGTGGCCATGAACGCATTCGAGTTAATTTCTATGTCCAAAGGGCTCAACCTTGGGAAT
TTGTTTGATGTAGAGCAGGGATTTAAGAGGGAAACGAGGTTCACGTCTAAATGTCCAGCT
AACGAGATAGTCAGCAAGATTGAAGAAGCTGCTAAACCTCTTGGTTTTGATGTTCACAAG
AAAAACTACAAGCTGAGACTTGAAAATGTGAAAGCTGGGAGAAAAGGAAACCTTAACATT
GCTACTGAGGTATTCCAAGTGGCACCCTCTCTTCATATGGTTGAGGTGCGAAAAGCAAAA
GGTGACACTTTGGAATTCCACAAGTTCTATAAGAATCTTTCAACCTGCCTCGAGGACGTG
GTTTGGAAAACAGAGGAGGACATGCAAGAAATGAAGTGA
>AvCIPK18 | Symbols: R_transcript_29589
ATGCGAAGGAATATCATTGGAGGAGTAATGCCGGTGATTGAAGATGAGGTAGGCAATGTT
TTGCCGCCGGCCGGCGATATCCCTGCGGATTCTGTGAAAACCCTGTTCGGAAAGTACGAG
GTAGGGAAGCTTCTCGGCTACGGAGCCTTCGCGAAGGTGTACCACGGCAGGGACGTGAGG
ACTGGACAGAGCGTGGCCATTAAGGCGGTGAGTAAACAGAAAGTGCTCAGAGGGGGATTC
ACGGCAAACGTTAAGCGGGAGATCTCTATCATGCGCCGGATGCGCCACCAGCACATCGTG
CGCCTCCTCGAGGTCATGGCCACGAAGACGAAGATCTACTTCGTTCTCGAGTTTGCCAAG
GGCGGCGAGCTCTTCGCCAAGGTCGCCAAGGGCCGTTTCAGCGAAGATCTCAGCCGCCGG
TACTTCCAGCAGTTGATCTCCGCTATCGGATACTGCCACTCCCATGGCGTCTTCCACCGC
GATCTGAAGCCAGAAAACCTCCTCCTCGACGAGAATTGGGACCTCAAAGTCACCGATTTT
GGCCTCAGCGCCGTCAAGGACCAGATCCGAGCGGACGGACTCCTCCACACCTTGTGCGGG
ACCCCTGCCTACGTGGCGCCGGAGATCCTCGCGAAGAAGGGATACGACGGTGCGAAGGTC
GACGTCTGGTCGTGCGGCGTCATCCTCTACGTGTTGAACGCCGGTTTTCTACCGTTCAAC
GATCCGAATCTGATGGTGATGTACCGGAAAATCTACAAAGGTGAGTTTCGTTGCCCTAAG
TGGACTTCTCCAGATCTGAAGCGGTTCTTGTCTCGCCTCCTCGACACGAATCCGGATACC
CGCATCACCGTCGACGAGATGGTCAACGATCCATGGTTCAAAAAGGGCTACAAAGAGATC
AAATTCCACTCCGAAGATTTCGAGATCAAGGAAAACGGCGACAGCGGAAAGTTCTTAAAC
GCTTTTGACATAATCTCGTTCTCATCCGGTATTGATCTGTCCAGTCTGTTCAACCAACCG
GAGGTTTCCGCCGTCGGTGAGCGGTTCTTGTCGGCCGAGTCGCCGGAGAGAGTTATCGAG
AAGGTAGAAGAGGTGGCGAAGGCGGAGGGGTTGACTGTGACGAGGAAGAAGGATCTGGGG
GTAAAATTGGAAGGGCAAAATAGTAATTTCGTTGCGTTGGTGGAGGTTCACCGGTTAACG
GAGAAGCTGGTTGTGGTTGAGGTTAAGAGGAGAGAGAGCGAAGCAGGACCTAGCCGTGAA
ATTTGGAAAGATAAACTCAGGCCCCAGTTGAGCTCTATCGTTTACCAACCGGAACGGTAA
>AvCIPK19 | Symbols: R_transcript_3277
ATGGAAAACAAAGGGATCGTGCTGATGCAGCGATATGAATTAGGGAGGTTATTAGGACAA
GGAACCTTTGCCAAGGTCTACCATGCAAGGAACCTTAAAACTGGCAGGAGTGTGGCCATT
AAGATGATCGACAAAGAGAAGGTTTTCATGGTTGGGATGATTGATCAGATCAAGCGAGAG
ATTTCTGTGATGAAGTTAGTTAGACACCCAAACATCGTGCAGCTTTATGAAGTTATGGCC
AACAAAAGCAAAATTTACTTTGTCATGGAATACGTCAAAGGCGGTGAACTTTTCAACAAG
GTGGCGAAAGGGAAGCTGAAGGAGCACGTTGCAAGGAAGTATTTCCAACAGCTGATCAGC
GCTGTGGATTTCTGCCACAGTAGAGGTGTTTATCACCGGGACTTGAAACCGGAGAACCTA
CTATTGGATGAAAATGGGAATCTCAAGGTTTCAGATTTTGGATTGAGTGCTCTTACTAAA
TCTAAGCATCAAGACGGGTTGCTCCACACAACTTGTGGAACACCTGCCTATGTTGCTCCT
GAGGTGATCAACGGAAAAGGTTATGATGGATCAAAAGCTGACATCTGGTCATGTGGGGTC
ATCTTATACGTTCTACTGGCTGGAGCTCTTCCATTCCAGGATTCGAATTTGATGGAGATG
TATAGAAAGATTGGAAAGGCAGAATTCGAATTCCTTAATTGGTTCTCCCCGGGAGCACGA
AGGCTGATATCGAAGATACTTGACCCGAACCCAAATGCACGAATCTCCATATCCAAAATC
ATGGAAAGTTCTTGGTTTCGGAAGGGCTTTGATTACAAGTCAATGAGAGTTAAAATGGAA
GAGAAAGATCCAGATAGCCTTAATGCCAATGCAATTTTTGGTCCGTGTGAGGATAGCAGC
CCTGCAGCAGAGGCAAAGTTAGACTTGGTAAGGCCTAGCAACTTGAATGCTTTCGATATC
ATTTCGTTTTCAGCTGGCTTTGACTTGACTGGTTTGTTCGAGGAAAATGACCAAAAGAAA
GAAGTGCAATTCACATCCAACCAAACCGCAAAGACCATTATTTCTAAGTTGGAGGACATC
GCCAAGCGTTTGAAGCTGAAAATAATGAAGAAAAAGGGAGGGGTGTTGAAATTGGAGGGA
GCAAAGGAAGGTCGAAAAGGTGCTTTGTCTATTGACACGGAGATTTTTGAGGTCACCCCG
ACATTTCATTTGGTCGAGGTTAAAAAGTCAAGTGGAGACACATTGGAGTATCAGAAGATG
ATGAAGCATGATATAAGGCCGGCACTTAAAGACATTGTTTGGACTTGGCAAGGTGATCAG
CCACGGACACAGCAACAACAAGATGATGAACCGGAGCTAGAGTCTTCTCAGTTGCTCCCA
TTACAAGCGATTTCACCTCAATCAGTCACTTCCTATTGA
>AvCIPK20 | Symbols: R_transcript_33195
ATGGAAAACAAAGAGATCGTGCTGATGCAACAATATGAATTAGGGAGGTTATTAGGACAA
GGAACCTTTGCCAAGGTCTACCATGCAAGGAACCTTACAACTGGCCAAAGTGTGGCCATT
AAGATGATCCACAAAGAGAAGGTTTTCAAGGTTGGGATGTTTGATCAGATCAAGCGAGAG
ATTTCTGTGATGAAGCTGGTTAGACACCCAAACATCGTGCAGCTTTATGAAGTTATGGCA
AGCAAAAGCAAAATTTACTTTGTCATGGAATATGTCAAAGGCGGTGAACTTTTCGACAAG
GTTTCGAAAGGGAAGCTGAAGGAGGATATTGCAAGGAATTATTTTCAACAGCTGATCAGC
GCTGTTGATTTCTGCCACAGTAGAGGTGTTTATCACCGGGACTTGAAACCGGAGAACATA
CTATTGGATGAAAATGGGAACCTCAAGGTTTCGGATTTTGGATTGAGTGCTCTTACTGAA
TCTAAGCGTCAAGACGGGTTACTCCACACAACTTGCGGAACACCTGCCTATGTTGCTCCT
GAGGTGATCAACCGAAAAGGTTATGATGGATCAAAAGCTGACATCTGGTCCTGTGGGATC
ATCTTATATGTTCTACTGGCCGGAGCTCTCCCATTCCATGGTTCGAATCTGATGGAGATG
TATAGAAAGATTGGAAAGGCGGAATTTGAATTCCCTAATTGGTTTTCCCCACGAGCACGG
AGGCTGATTTCAAAGATACTTGACCCGAACCCAAATACACGAATCTCCATACCCAAAATC
ATGGAAAGTTCTTGGTTTCGGAAGGGCTTTGATTACAAGTCGATGAGAGTTAAAATGGAA
GAGAAAGATCCAGATAGCCTTAATGCCGATGCAATTTTTGGTCCGTGTGAAGATAGCAGC
ACTGCAGCAGAGGCAAAGCAAGACTTGGCAAAGCCTAGCAACTTGAATGCCTTTGATATC
ATTTCGTTTTCAGCAGGCTTTGACTTGTCTGGTTTGTTTGAGGAAAATGATCGAAAGAAA
GAAGCGCGATTCACGTCCAACCAAACCGCGAAGACCATTATTTCTAAGTTGGAGGACATT
GCCAAGCGTTTGAAGCTGAAAATACTGAAGAAAAACGGAGGGGTGTTGAAATTGGAGGGA
GCAAAGGAAGGTCGAAAAGGCGCATTGTCTATTGACGCGGAGATCTTTGAGGTCACTCCT
ACATTTCATTTGGTCGAGGTTAAAAAATCAAGTGGAGACACATTGGATTATCAGAAGATG
ATGAAGAAGTATATAAGGCCGGCGCTTAAAGACATCGTTTGGACTTGGCAAGGTGATCTG
CCGCGGACACAGCCGCAGCAAGATGATGAACCAGAGTCTTCTCAGTTGCTCCCATTGCAG
GCTATTTCATCTCAGTGA
>AvCIPK21 | Symbols: R_transcript_36613
ATGGTGGTGAGGAAGGTAGGGAAGTACGAAGTGGGGAGGACGATCGGAGAAGGAACCTTC
GCGAAGGTGAAGTTCGCTCAGAACACGGAGACTGGTGAGAGTGTCGCCATGAAAGTTCTC
GATCGCACCACCATCCTCAAGCACAAGATGGTCGATCAGATTAAGAGGGAGATATCTATA
ATGAAGCTTGTCAGACATCCAAATGTTGTTCGTCTGCACGAGGTTCTGGCGAGTCGCACG
AAGATCTATATAATCTTGGAATTTATTACAGGTGGTGAATTATTTGATAAAATAGTCCAC
CATGGAAGACTCAGTGAAGCTGACTCGAGGAGATTCTTCCAACAACTCATTGATGGTGTG
GATTATTGCCATAGCAAGGGAGTCTACCACAGAGATCTGAAGCCTGAAAATCTTTTACTG
GATTCTGAAGGAAATCTCAAAATTTCAGATTTTGGGCTTAGTGCCTTACCTGGAGAAGGA
GTCAGCCTCCTTCGAACGACTTGCGGGACTCCTAACTATGTTGCACCTGAGGTACTCAGT
CATAAGGGTTATGATGGTGCTGTTGCTGATGTTTGGTCCTGTGGGGTCATTCTATATGTT
CTGATGGCAGGATATCTTCCATTTGATGAAATTGATCTCACCACATTGTATAGTAAGATA
GACAAAGCAGAGTTTTCGTGTCCATCATGGTTTCCAGTAGGAGCAAAATCTTTAATTCAT
CGAATTATAGATCCAAATCCTGAAACTCGTATTCGGATTGAAGAGATAAGGAATGATGAG
TGGTTTAAGAGGAGTTATGTTCCTGTCAAACTTATTGAATATGAAGATGTTAACCTGGAT
GATGTTAATGCTGTTTTTGACGATCCCGAGGAAGAACAGGTTGATGAGAAGTGCAGGAAT
GAGCATTTGGGTCCTCTGACTCTTAATGCATTCGACCTAATTATTCTCTCTGAAGGTCTA
AACCTTTCGTCACTGTTTGATCGTCGACAGGACTCTGCGAATCATCAAACACGCTTTGTT
TGCCAGAAACCAGCACAGGTGGTTTTATCAACAATGGAAGTTGTTGCACAATCAATGGGT
TTTAAGACCCATATACGTAATTATAAGATGAGAGTGGAAGGCCTTTCAGCAAACAAGACG
TCGCATTTCTCTGTCATTTTGGAAGTATTTGAAGTTGCTCCTACATTCTTGATGGTCGAC
ATGCAGAAAGCAGCTGGAGATGCTGGTGAATACCTCAAGTTTTACAAGAATTTTTGTGAC
AATCTTGAGGATATCATCTGGAGGCCGTCTAACGAACCGTGCAAATCAAGGGTTATCAAG
ACTAATAAGAGCAAAAGGCGATAA
>AvCIPK22 | Symbols: R_transcript_37461
ATGCGAAGGAATATTATTGGAGGAGTAATGCCGGTGATTGAAGATGAGTCAGGCAATGTT
TTGCCGCCGGCCGGCGACATTCCGGCGGATTCTGAGAAAACCCTGTTCGGAAAGTACGAG
GTAGGGAAGCTTCTCGGCTACGGAGCCTTCGCGAAGGTGTACCACGGCAGGGACGTGAGG
ACTGGACAGAGCGTGGCCATTAAGGCGGTGAGTAAACAGAAAGTGCTCAAAGGAGGGTTC
ACGGCGAACGTTAAGCGGGAGATCTCTATCATGCGCCGGATGCGCCACCATCACATCGTG
CGCCTCCTCGAGGTTATGGCCACGAAGACGAAGATCTACTTCGTTCTCGAGTTCGCCAAG
GGCGGCGAGCTCTTCGCCAAGGTCGCCAAGGGCCGTTTCAGCGAAGATCTCAGCCGCCGG
TACTTCCAGCAGCTGATCACCGCCATCGGATACTGCCACTCCCATGGCGTCTTCCACCGC
GATCTGAAGCCAGAAAACCTCCTCCTCGACGAGAATTGGGACCTCAAAGTCACCGATTTC
GGCCTTAGCGCCGTCAAGGACCAGATCCGAGCGGACGGACTCCTCCACACCTTGTGCGGG
ACCCCTGCCTACGTGGCGCCGGAGATCCTCGCGAAGAAGGGATACGACGGTGCGAAGGTC
GACGTCTGGTCGTGCGGCGTCATCCTCTACGTGTTGAACGCCGGTTTTCTACCGTTCAAC
GATCCGAATCTGATGGTGATGTACCGGAAAATCTACAAAGGTGAGTTTCGTTGCCCTAAG
TGGACCTCTCCAGATCTGAAGCGGTTCTTGTCTCGCCTCCTCGACACGAATCCGGATACT
CGCATCACCGTCGACGAGATGGCCAACGATCCATGGTTCAAAAAGGGCTACAAAGAGATC
AAATTCCAGTCCGAAGATTTCGAGATCAAGGACAACGGCGACAGCGGAAAGTTCTTAAAC
GCTTTTGACATAATCTCGTTCTCATCCGGTATAGATCTGTCCGGTCTGTTCAACCAACCG
GAGGGTTCCGCCGTCGGCGAGCGGTTCTTGTCGGCGGAGTCTCCGGAGAGAGTCATCGGG
AAGGTAGAAGAGGTGGCGAAGGCGGAGGGGTTGACGGTGACGAGTAAGAAGGATCTGGGG
GTAAAATTGGAAGGGCAAAATGGTCATTTCGTTGCGTTGGTGTTGGTTCACCGGTTAACG
GAGAAGCTGGTTGTGGTTGAGGTTAACAGGAGAGAGAGCGAGGCTGGACCTAGCCGTGAA
ATTTGGAAAGATAAACTCAGACCCCAGTTGAGCTCTATCGTTTACCAACCGGAACGGTAA
>AvCIPK23 | Symbols: R_transcript_40474
ATGTCTTCTCGATCGGGTGGGAGTGGGATTGGGGGTGGGGGGAGGACGAGGGTGGGGAGG
TACGAGCTGGGGCGGACGCTGGGGGAGGGGACGTTTGCGAAAGTGAAATTTGCGAGGAAT
GTAGAGAGTGAAGAGAATGTGGCCATTAAGATTCTCGACAAAGAGAAGATTCTCAAGCAC
AAGATGATCAGTCAGATTAAACGTGAAATTTCAACCATGAAACTAATCAGACATCCAAAT
GTTATTCGTATGTTTGAGGTTATGGCTAGCAAGACAAAAATATACATTGTTTTGGAATTT
GTGACTGGGGGTGAACTCTTTGACAAAATTGCTAGTAAAGGGAGATTGAAAGAAGACGAA
GCAAGGAGGTACTTTCAGCAGCTCATAAATGCGGTGGATTACTGCCACAGCAGAGGCGTT
TTCCATAGAGACCTGAAGCCAGAGAATCTGCTGCTGGATGCAAATGGAGTCCTTAAAGTT
TCAGATTTTGGATTAAGTGCTCTACCTCAGCAAGTTCGAGAAGATGGGCTTCTACACACA
ACCTGTGGAACACCAAATTATGTTGCTCCTGAGGTGATCAACAATAAAGGCTATGATGGA
GCTAAGGCAGACCTGTGGTCTTGCGGTGTAATCCTTTTTGTCCTTATGGCAGGCTATCTA
CCTTTTGAAGAGTCCAATCTCATGGCATTATACAAAAAGATTTTCAAGGCTGACTTCACA
TGTCCTTCATGGTTTTCCTCAAGCGCAAAGAAACTAATCAAAAGGATCCTGGATCCTAAT
CCCATGACACGCATTACGATTGCAGAGCTCATTGAGAATGAGTGGTTTAAGAAGGGATAC
AAGCCACCCACTTTTGAACAGGCAGATGTTAGTCTCGACGATGTGGATGCTATTTTTGAT
GAATCAGGGGACACTCAAAACCTTGTCGTGGAAAGGCGGGAAGAACGAGCCACCGCTGTC
TTTATGAACGCTTTTGAGCTTATCTCTAAATCTGAGGGTCTAAACCTCAGTTCTCTATTT
GAAAAGCAAATGGGGCTTGTTAAACGGGAAACAAGATTTACATCTAAATGTCCTGCCAAT
GAGATTATCTCAAAAATCAAGGAAGCCGCAGCACCTTTGGGATTTGATGTGAAGAAAAAC
AATCATAAGCTGAAGCTTCAAGGGGAGAAAACTGGTCGCAAGGGTCATTTATCTGTTGCA
ACAGAGGTTTTTGAGGTGGCTCCCTCACTTTGTATGGTTGAGCTTCGCAAGGCCGGTGGG
GATACCTTGGAATTTCACAAGTTCTACAAGAACCTGGCAACTGGTTTGAAAGATATTGTC
TGGAAATCAGTCAATGAAGCAGAAGAGAAAGCACATGATGATGTTGGCATTGTCTCTTCT
TAA
>AvCIPK24 | Symbols: R_transcript_42573
ATGGCTTCGCGATCGAGTGGGAGTGGGGGGAGGACGAGGGTGGGGAGGTACGAGCTGGGG
CGGACGCTGGGGGAGGGGACGTTTGGGAAAGTGAAATTTGCGAGGAATGTAGAGAGTGAA
GAGATTGTGGCTATTAAGATTCTCGACAAAGAGAAGATTCTCAAGCACAAGATGATCAGT
CAGATTAAACGTGAAATTTCAACCATGAAATTAATCAGACATCCAAATGTTATTCGTATA
TTTGAGGTTATGGCTAGCAAGACAAAAATATACATTGTTTTGGAATTTGTGACTGGGGGT
GAACTCTTTGACAAAATTGTTACTAAAGGGAGATTGAAAGAAGACGAAGCAAGGAAGTAT
TTTCAGCAGCTCATAAATGCGGTGGATTACTGCCACAGTAGAGGTGTTTTCCATAGAGAC
CTGAAGCCAGAGAATCTGCTGCTGGATGCAAATGGAGTCCTTAAAGTTTCGGATTTTGGA
TTAAGTGCTCTACCTCAGCAAGTTCGAGAAGATGGGCTTCTACACACAACCTGTGGAACA
CCAAATTATGTTGCTCCTGAGGTGATCAACAATAAAGGCTACGATGGAGCTAAGGCAGAC
CTGTGGTCTTGCGGTGTAATCCTTTTTGTCCTTGTGGCAGGATATCTACCTTTTGAAGAG
TCCAACCTTATGGCATTATACAAAAAGATATTCAAGGCTGACTTCACATGTCCTTCATGG
CTTTCCTCGAGCGCGAAGAAACTAATCAAAAGGATCCTAGATCCTAGTCCCATGACGCGC
ATCACGATTGCAGAGCTCATTGAGAATGAGTGGTTTAAGAAGGGATACAAGCCGCCCACT
TTTGAGCAGGCAGATGTTAGTCTCGACGATGTAGATGGTATTTTTGATGAATCAGGGGAC
ACTCATAACCTTGTTGTGGAAAGGCGGGAAGAACGAGCCACCCCTGTCTCTATGAACGCT
TTTGAGCTTATCTCTAAATCTCAGGGTCTAAACCTCAGTTCTCTATTTGAAAAGCAAATG
GGGCTTGTTAAACGGGAAACAAGATTTACATCTAAATGCCCTGCCAAAGAGATTATCTCA
AAAATCGAGGAAGCTGCTGCGCCTTTGGGATTTGATGTGAAGAAATACAATTATAAGCTG
AAGCTTCAAGGGGAGAAAACTGGTCGCAAGGGTCATTTATCTGTTGCAACAGAGGTGTTT
GAGGTGGCTCCCTCACTTTGTATGGTTGAGCTTCGCAAGGCTGGTGGGGATACCTTGGAA
TTTCACAAGTTCTACAAAAACCTGGCGACTGGTTTGAAAGATATTGTCTGGAAATCAGTT
GATGAAACAAAAGAGGAAGCAAATGATGGTGTTGGTATTGTCTCCTCTTAA
>AvCIPK25 | Symbols: R_transcript_51271
ATGAGTCAGCCAAAAATTAAGCGTCGAGTCGGTATATATGACGTGGGAAGGACAATAGGC
GAGGGTACGTTTGCAAAAGTGAAATTTGCAAGGAATTCCGAGACTGGGGAATCAGTTGCT
CTCAAGATTCTTGACAAGGAGAAAGTTCTTAAACACAAAATGGCCGAACAGATAAAGCGG
GAAGTAGCGACAATGAAGTTGATAAAGCATCCAAATGTTGTTCGCTTATACGAGGTAATG
GGGAGCAAGACCAAGATATTTATTGTTTTGGAGTTTGTAAATGGGGGAGAATTGTTTGAC
AAAATTGTAAACCATGGGCGAATGAGAGAAGATGAAGCACGGAGGTATTTTCAGCAGCTT
ATCAATGCTGTTGATTATTGTCATAGCAGGGGAGTCTATCACAGGGATCTGAAGCCAGAA
AATTTGCTCTTGGATGCCTATGGAAACCTTAAAGTTTCTGATTTTGGATTAAGTGCTCTG
TCCCAGCAAGTCAGGGATGATGGGTTGCTTCATACTACATGCGGAACACCAAACTATGTC
GCTCCTGAGGTCCTCAATGACCGAGGCTATGATGGGGCAACTGCAGACTTGTGGTCCTGT
GGGGTCATACTCTTTGTATTGCTTGCAGGTTACTTGCCTTTTGATGATTCTAATCTTATG
AACCTGTATAAAAAAATTTCAGCCGCTGAGTTTACTTGCCCCCCCTGGCTCTCTTTTGGG
GCCATGAAATTGATCGCTCAAATCTTGGATCCCAACCCTATGACTCGCATCACTATACCC
GAACTTCTGGTAGATGAATGGTTTAAAAAAGGTTATAAGCCACCGGTTTTTGAGGAGAAG
GAAGATACAAATTTGGATGATGTCGAAGCTGTTTTTAGGGACTCGGAAGAACATCACGTG
ACAGAGAAGAAGGAAGAACAGCCGGTGGCCATGAACGCATTCGAGTTAATTTCTATGTCC
AAAGGGCTCAACCTTGGGAATTTGTTTGATGTAGAGCAGGGATTTAAGAGGGAAACGAGG
TTCACGTCTAAATGTCCAGCTAACGAGATAGTCAGCAAGATTGAAGAAGCTGCTAAACCT
CTTGGTTTTGATGTTCACAAGAAAAACTACAAGCTGAGACTTGAAAATGTGAAAGCTGGG
AGAAAAGGAAACCTTAACATTGCTACTGAGGTATTCCAAGTGGCACCCTCTCTTCATATG
GTTGAGGTGCGAAAAGCAAAAGGTGACACTTTGGAATTCCACAAGTTCTATAAGAATCTT
TCAACCTGCCTCGAGGACGTGGTTTGGAAAACAGAGGAGGACATGCAAGAAATGAAGTGA
>AvCIPK26 | Symbols: R_transcript_53070
ATGGGGTATGTGAATACCATTGGAAAGTACCAACTCGGTCGAACGATTGGAGAAGGTACT
TTCGCAAAGGTTAAGTTAGCCGCAAACACAGAAGATGGCCACTATGTGGCAATCAAGGTC
ATCGATAAGCACATGGTCATTGAAAACAATCTCATGCACCAGGTGCAGAGAGAAATAAGC
ACAATGAAGCTTTTGCATCACCCAAACATTACAAGGATACACGAGGTGATTGGCACGAAA
ACAAAAATTTACATAGTAATGGAGTACGTATCGGGAGGAGTGTTATCCGACAAGATGTCG
TATGTCAATAGGTTGAGTGAAAGAGAGGCGAGGAAGCACTTTCAGCAGTTAATCGATGCT
GTAGATTACTGCCATTGCAGAGGGGTTTACCACAGAGATCTAAAGCCACAAAACTTGCTT
TTGGATAGCAAAGGAAATCTCAAAGTATCAGATTTTGGCCTCAGCGCCTTGAGAAAGCCC
GGACTGCTATCGACTGCGTGTGGATCTCCAAGCTATGTAGCACCAGAGCTGCTTACAAAC
AAGGGCTACGAGGGAGCGGCTGCAGATGTTTGGTCCTGTGGAGTACTCCTTTTTGAATTG
CTCGCCGGTTATCTACCATTTGATGACCGTAACCTGATGAACTTGTATAGGAAGATCTTG
AGAGCAGAATACAAATTTCCAGATTGGTTCACAGAAAGCCAAAAGAAACTGATCTCCAGG
ATATTTGATCCGAATCCCCAAAAGCGAATAAAAATACCAGATATTATCGATGATGAGTGG
TTTCAAACTAATTATGAGCCAGCTGTGCGAATTGAATGTGGTGAAGACATAAATTTTGAT
GATGTTCATGCAGCTTTCAATTCAGTTAAGGAAAATGTGACTGAGAAAAAAATACCCCCT
ACTCCAAGTTTCATAAATGCTTTTCAGCTAATAGCCATGTCCCATGACCTTGATTTGTCA
GGACTATTTGAAGAACAGGATAATGAGAAGCAAAAAACAACGCTTGGATCAAAGCATACG
ATCAATGAAACCATAGAGAAAATTGAGGCTGCTGCGAAGGATGTGAGTCTCTCTGTTGAA
AGGATGAACAAATCAAAGGTGAAAATTCATCCAAATCAGAAGATGACTAGATGTTCAAGG
TCATGCTTTAATCTATCAGCAGAGGTAATTGAGGTAGCACCAACACATTGTGTTGTTGAA
ATATCAAAATCTGTAGGGGAGCTAGAACCGTACAGAGAGTTTTGCAAAAGCTTATCAAGT
ATGCTGTCAGAAGAATCAGGTGTGCCATTTGAAACACAATCACCTAAGGCAGGCACGGCC
AGCAGTAAAAGTATCCAACAAAATGAAAGCATTGTACAGAATGATGACAAGGACCCTAAA
GACCTGCGAGGCTATTCTTCCTCTTGA
>AvCIPK27 | Symbols: R_transcript_53700
ATGGTGGTGAGGAAGGTAGGGAAGTACGAAGTGGGGAGGACGATCGGAGAAGGAACCTTC
GCGAAGGTGAAGTTCGCTCAGAACACGGAGACTGGTGAGAGTGTCGCCATGAAAGTTCTG
GATCGCACCACCATACTCAAGCACAAGATGGTCGATCAGATTAAGAGGGAGATATCTATA
ATGAAGCTTGTCAGACATCCAAATGTTGTTCGTCTGCACGAGGTTCTGGCGAGTCGCACG
AAGATCTATATAATCTTGGAATTTATTACAGGTGGCGAATTATTTGATAAAATAGTTCAC
CATGGAAGACTCAGTGAAGCTGACTCGAGGAGATTCTTCCAACAACTCATTGATGGTGTG
GATTATTGCCATAGCAAGGGAGTCTACCACAGAGATCTGAAGCCTGAAAATCTTTTACTG
GATTCTGAAGGAAATCTCAAAATTTCGGATTTTGGGCTTAGTGCCTTGCCTGGAGAAGGA
GTCAGCCTCCTTCGAACGACTTGCGGGACTCCTAACTATGTTGCACCTGAGGTACTCGGT
CACAAGGGCTATGATGGTGCTGTTGCTGATGTTTGGTCCTGTGGGGTCATTCTATATGTT
CTGATGGCAGGATATCTTCCATTTGATGAAATTGATCTCACCACATTGTATAGTAAGATA
GACAAAGCAGAGTTTTCGTGTCCGTCATGGTTTCCAGTAGGAGCAAAATCTTTAATTCAT
CGAATTTTAGATCCAAATCCTGAAACTCGTATTCGGATTGAAGAGATAAGGAGTGATGAG
TGGTTTAAGAGGAGTTATGTTCCTGTCAAACTTATTGAATATGAAGATGTTAACCTGGAT
GATGTTAATGCTGTTTTTGACGATCCCGAGGAAGAACAGGTTGATGAGAAGGGCAGGAAT
GAGCATTTGGGTCCTCTGACTCTTAATGCATTCGATCTAATTATTCTCTCTGAAGGTCTA
AACCTTTCGTCACTGTTTGATCGTCGGCAGGACTCTGCGAATCATCAAACACGCTTTGTT
TGTCAGAAACCAGCACAGGTGGTTTTATCAACAATGGAAGTTGTTGCACAATCAATGGGT
TTTAAGACCCATATACGTAATTATAAGATGAGAGTGGAAGGCCTTTCAGCAAACAAGACA
TCGCATTTCTCGGTCATTTTGGAAGTATTTGAAGTTGCTCCTACATTCCTGATGGTCGAC
ATGCAGAAAGCAGCTGGAGATGCTGGTGAATACCTCAAGTTTTACAAGAATTTTTGTGAC
AATCTTGAGGATATCATCTGGAGGCCGTCCAACGAACCGTGCAAATCAAGGGTTACCAAG
ACTAAGAGCAAAAGGCGATAA
>AvCIPK28 | Symbols: R_transcript_53727
ATGGAAAACAAAGAGATCGTGCTGATGCAACAATATGAATTAGGGAGGTTATTAGGACAA
GGAACCTTTGCCAAGGTCTACCATGCAAGGAACCTTACAACTGGCCAAAGTGTGGCCATT
AAGATGATCCACAAAGAGAAGGTTTTCAAGGTTGGGATGTTTGATCAGATCAAGCGAGAG
ATTTCTGTGATGAAGCTGGTTAGACACCCAAACATCGTGCAGCTTTATGAAGTTATGGCA
AGCAAAAGCAAAATTTACTTTGTCATGGAATATGTCAAAGGCGGTGAACTTTTCGACAAG
GTTTCGAAAGGGAAGCTGAAGGAGGATATTGCAAGGAATTATTTTCAACAGCTGATCAGC
GCTGTTGATTTCTGCCACAGTAGAGGTGTTTATCACCGGGACTTGAAACCGGAGAACATA
CTATTGGATGAAAATGGGAACCTCAAGGTTTCGGATTTTGGATTGAGTGCTCTTACTGAA
TCTAAGCGTCAAGACGGGTTACTCCACACAACTTGCGGAACACCTGCCTATGTTGCTCCT
GAGGTGATCAACCGAAAAGGTTATGATGGATCAAAAGCTGACATCTGGTCCTGTGGGATC
ATCTTATATGTTCTACTGGCCGGAGCTCTCCCATTCCATGGTTCGAATCTGATGGAGATG
TATAGAAAGATTGGAAAGGCGGAATTTGAATTCCCTAATTGGTTTTCCCCACGAGCACGG
AGGCTGATTTCAAAGATACTTGACCCGAACCCAAATACACGAATCTCCATACCCAAAATC
ATGGAAAGTTCTTGGTTTCGGAAGGGCTTTGATTACAAGTCGATGAGAGTTAAAATGGAA
GAGAAAGATCCAGATAGCCTTAATGCCGATGCAATTTTTGGTCCGTGTGAAGATAGCAGC
ACTGCAGCAGAGGCAAAGCAAGACTTGGCAAAGCCTAGCAACTTGAATGCCTTTGATATC
ATTTCGTTTTCAGCAGGCTTTGACTTGTCTGGTTTGTTTGAGGAAAATGATCGAAAGAAA
GAAGCGCGATTCACGTCCAACCAAACCGCGAAGACCATTATTTCTAAGTTGGAGGACATT
GCCAAGCGTTTGAAGCTGAAAATACTGAAGAAAAACGGAGGGGTGTTGAAATTGGAGGGA
GCAAAGGAAGGTCGAAAAGGCGCATTGTCTATTGACGCGGAGATCTTTGAGGTCACTCCT
ACATTTCATTTGGTCGAGGTTAAAAAATCAAGTGGAGACACATTGGATTATCAGAAGATG
ATGAAGAAGTATATAAGGCCGGCGCTTAAAGACATCGTTTGGACTTGGCAAGGTGATCTG
CCGCGGACACAGCCGCAGCAAGATGATGAACCAGAGTCTTCTCAGTTGCTCCCATTGCAG
GCTATTTCATCTCAGTGA
>AvCIPK29 | Symbols: R_transcript_54267
ATGGAGAAAAAGGGGAATGTATTGATGAAAAGGTTTGATTGGGGGAGATTATTAGGACAA
GGAAACTTTGCTAAGGTTTACTATGGGAGAAACCTTGAATCTGGCCAGAGTGTGGCCATC
AAAGTAATCGACAAAGAGAGAGTTTTGAAGGTAGGGTTGATGGATCAGACCAAGCGAGAA
ATATCGGTTATGGGATTGGTGAAACACCCGAACATAGTGCAGCTTTACGAGGTCATGGCC
ACCAAAACGAAGATATACCTCATCATGGAATACGCCAAAGGTGGAGAGCTCTTTCACAAG
GTGGTCAAAGGCAGGCTCAAGGAAGACATCGCGAGGAAGTATTTTCAACAGTTGATCTGT
GCCGTCGATTTTTGTCACGGCATGGGTGTTTATCACCGGGATTTGAAACCAGAAAACCTG
CTGCTCGATGAGTATGGGAATCTAAAGGTGACAGATTTCGGCTTGAGTGCCTTTGCTGAG
TCTAATCGTCAAGACGGATTACTCCACACAACGTGTGGAACTCCTGCCTATGTTGCTCCT
GAAGTGATCAGTAGAAGAGGCTACGATGGAGTCAAAGCCGATATCTGGTCTTGTGGGGTG
ATCTTGTTTGTTCTGCTAGCAGGTCATCTTCCATTTCACGACTCAAACCTTATGGAGATG
TATCGGAAGATAAGCAAGGGGGACTTCAAGTGCCCTAATTGGTTTCCACTGGAAGTGCGC
AAGCTGCTTTGCACGATCCTCAACCCCAACCCGTACACTAGGACATCCATTGCCAAAATC
ATGGAAAATCCTTGGTTCAGGAAAGGATTCGACACCAAATCCAAAACTATCGAAGTGGAA
AGAAAGGAAATGCCTCCACCAACTGCTGACGGCATTTGCAACCCTTGTGGGGCTAGTGGT
GGTACTGCTGCTGCTGCTGCTGCTGCAGAGGCAAAGATAGAGTCACCCAAACCTACAAAT
TTGAATGCTTTCGATATAATCTCTCTTTCGACAGGTTTCGATTTATCTGGTTTGTTTGTG
GAAAACGACCAAAAGGAACAAGTACAATTCACATCTGCAAAGCCAGCCTCAGCTATCATA
TCCAGACTCGGGGAGATTGGCAAGCATCTGAAGCTGAAAGTCGTGAAGAAGGACGGAGGG
TTGTTGAAATTCGAGCGACCAAATGAAGGCGCAAGGGGGGCTTTGTGTATTGATATTGAG
ATATTTGAAATCACTTCATCTTTTCATGCAGTGGAGGTGAAAAAGTCTAGAGGTGATGTA
TTGGAATATCGGAAGATATTGAAACTGGATATAAGACCAGCTCTTAACGACATTGTTTGG
GCTTGGCAAGGTGAGGAACACCACCACCAGCAACAATAG
>AvCIPK30 | Symbols: R_transcript_59110
GAGATTTCCTTTCTGCGGACATGCTCAATAACTTTGAATTGCTATCTATTTATGGAGAAA
TTCACAAGTGTCAGGAACTGTAATTATAAGAGAATTTCCACCTGTAAATCAAGTATGAGT
CAGCCAAAAATTAAGCGTCGAGTGGGTATATATGAGGTGGGAAGGACAATAGGCGAGGGT
ACGTTTGCAAAAGTGAAATTTGCAAGGAATTCCGAGACTGGGGACTCAGTTGCTCTCAAG
ATTCTTGACAAGGAGAAAGTTCTTAAACACAAAATGGCTGAACAGATAAAGCGGGAAGTA
GCGACAATGAAGTTGATCAAGCATCCAAATGTTGTTCGCTTATACGAGGTAATGGGGAGC
AAAACCAAGATATTTATTGTTTTGGAGTTTGTAACTGGGGGAGAATTGTTTGACAAAATT
GTAAACCATGGGCGAATGAGAGAAGATGAAGCACGGAGGTATTTTCAGCAGCTTATCAAT
GCTGTTGATTATTGTCATAGCAGGGGAGTCTACCACAGGGATCTGAAGCCAGAAAATTTG
CTCTTGGATGCATATGGAAACCTTAAAGTTTCTGATTTTGGATTAAGTGCTCTGTCCCAG
CAAGTCAGGGATGATGGGCTGCTTCATACTACATGCGGAACACCAAACTATGTCGCTCCT
GAGGTCCTCAATGACCGAGGCTATGATGGGGCAACTGCAGACTTGTGGTCCTGTGGGGTC
ATACTCTTTGTATTGCTTGCAGGTTACTTGCCTTTTGATGATTCTAATCTTATGAACCTG
TATAAAAAAATTTCAGCCGCGGAGTTTACTTGCCCCCCCTGGTTGTCTTTTGGGGCCATG
AAATTGATCGCTCGAATCTTGGATCCCAACCCTATGACTCGCATCACTATACCCGAACTT
CTGGTAGATGAATGGTTTAAAAAAGGTTATAAGCCACCGGTTTTTGAGGAGAAGGAAGAT
ACAAATTTGGATGATGTCGAAGCTGTTTTTAGGGACTCGGAAGAACATCACGTGACAGAG
AAGAAGGAAGAACAGCCGGTGGCCATGAACGCATTCGAGTTAATTTCTATGTCCAAAGGG
CTCAACCTTGGGAATTTGTTTGATGTAGAGCAGGGATTTAAGAGGGAAACGAGGTTCACT
TCTAAATGTCCAGCTAACGAGATCGTCAGCAAGATCGAAGAAGCTGCTAAACCTCTTGGT
TTTGATGTTCACAAGAAAAACTACAAGCTGAGGCTTGAAAATGTGAAAGCTGGGAGAAAA
GGAAACCTTAACGTTGCTACTGAGGTATTTCAAGTGGCACCCTCTCTTCATATGGTTGAG
GTGCGAAAAGCAAAAGGAGACACTTTGGAATTCCACAAGTTCTATAAGAAGCTTTCAACC
TGCCTCGAGGACGTGGTTTGGAAAACTGAGGAGGACATGCAAGAAATGAAGTGA
>AvCIPK31 | Symbols: R_transcript_60450
ATGGCTATGGAACGGCCCGCCCCACCGCGTTCCTCCGCCGCAACCACCACCACGACCAAC
AATGGAATCATATTGGGCAAGTACCGATTGGGCCGGCTTTTGGGCCGGGGCAGCTTTGCC
AAGGTCTACCAGGCCCAATCTCTAAGCAACGACACGACGGTGGCTATTAAGGTGATCGAC
AAGGCCAAGACGGTGGACGCCTCCATGGAGCCTCGGATCGTGCGCGAAATCGCCGCCATG
CGCCGCCTCAGCCACCACTCCAACATCCTCCAAATCCACGAGGTCATGGCCACAAAAACC
AAGATCTACCTCGTCATGGATCTCGCCGCAGGCGGTGACCTCTCCAGCGCCCTCGCCCGC
CGACGCCGCCGACACCTCCCTGAATCCGCCGCTCGCCGCTACTTTCAGCAGCTCGTCTCC
GCCCTCCACTTCTGCCACCGCCAAGGCGTCGCCCACCGCGACATCAAGCCCCAGAACCTC
CTCCTCGATTCCGCCGGAACCCTAAAGATCTCTGACTTCGGCCTCGCCGCCCTGCCGGAA
AACCGCGAGAACCTCCTCCACACCGCCTGCGGGACCCCGGCGTTCGCCGCCCCTGAGGTG
GTCCGACGCGGCGGTGGCTACGACGGCGCGAAGGCAGACGCCTGGTCGTGCGGCGTCATT
CTCTTCCTCTTCCTCGCCGGAAACCTCCCCTTCGACGATTCCAACCTCGCCTCCATGTTC
CAGAAGATTTGCCGCCGCGAATTTCAATTCCCCGATTGGATCTCGAAGCAATCGAAATTC
ATCATCTATCGTTTATTAGATCCAAATCCCAATTCGAGGATGACTTTAGAGACCTTAATC
GATCACTCTTGGTTCAAGAAATCATTGCAATTAGACCCCTCTGCGCAAAATCCACCTCCC
CAATTCAGCAAACTCCAAGCCCAAGCGAAGAGACAGACTATGAACGCGTTTGATATAATT
TCGATGTCATCGGGGTTGGATTTATCGGGGCTTTTCGAGCCCAGCTCGACTCGTGAGAGA
GAGAGGAGGTTTACGGCGAAGGCAACGGAGGCGGCGGTTGAGGAGAGAGTTGGGGAGGTG
GGAGAGAGATTGGGGTACAGAGTAGATCGAGAGAAGGATAGGAAGAGTGTTGGGTTGTTG
AAGGGAAGGGTCGTTTTGGAATTTGAGATTATGGTGGTGGCGGAGGGGTTGGTGATGGTG
GTGGTGATGGTGGGTGGTGGTGGCTTTGAGGAGGTTAATTGGGAGGATTTGAGAGTAGGT
TTTGGGGACATAGCTCTTGATTGGCATAATGAGGGGTCTTGA
>AvCIPK32 | Symbols: R_transcript_62544
ATGACCGACCATAAGGGTAGCGAGAAATCACAACCCCACTGCGTACTCCACGGGAAGTAC
GAGCTGGGGCGGTTGTTGGGCCACGGCACGTTCGCGAAGGTGTACCACGCGCGGCACCTG
GTGACGGGGAAGAGCGTGGCGATGAAGGTGGTCGGAAAGGAGAAGGTCATGAAGGTCGGC
ATGACAGAGCAGGTGAAGAGAGAGATCTCGGTGATGAAGATGGTGCAGCACCCGAATATC
GTCGAGCTTCATGAAGTTATGGCTAGCAAAACGAAGATCTACTTCGCGATGGAGCTCGTG
CGCGGCGGCGAGCTGTTCTCGAAGGTCGCCATGGGGCGGCTGCGGGAGGACGCCGCCAGG
AACTACTTCCAGCAGCTCATCTCCGCTGTCGACTTCTGCCACAGCCGCGGCGTCTACCAC
CGTGACCTCAAGCCAGAAAACCTCCTCCTCGACGACGACGGTAACCTGAAGGTGACCGAT
TTCGGTCTCTCGGCATTTGCCGACCACCTGAGGCAGGACGGGCTCCTCCACACCACCTGC
GGGACGCCGGCGTACGTGGCGCCGGAGGTGATCGGAAAAAAGGGCTACGACGGCGCTAAG
GCGGACATTTGGTCTTGCGGTGTTATTCTCTATGTGTTATTAGCTGGATTCTTACCATTT
CAGGACGATAACATTGTGTCTCTGTACCGGAAAATATACCGGGGCGACTTCAAGTGTCCC
CCGTGGTTCTCGCCGGAGTCGAGGCGGTTGATAACGAAACTGCTGGATCCAAATCCAAGC
ACTCGCATCACCGCCGCGAAGATCATGGAGTCGTCCTTCTTCAGGAAGACGATTCCGAGA
TCTATGAGTAGAGCCAAAGACGAGGAAAGTGTGATTATGGAAGATAAGCATAAAACCGAG
ACGCTGAACGCGTTCCACATAATCTCGTTGTCAGAGGGGTTCGATCTGTCGCCGCTCTTC
GAGGAGAAGAGGAGGGAGGAGAAGGAGGAGCTGAGGTTCGCGACGGCCGGGCCGGCGAGC
AGTGTGATATCGCGGCTGGAGGAGGTGGCGGCGAGGGCGGCGGGGAAGTTCAGCGTGAGT
AGGCGCGGCGACACCAGCGTGCGGCTTCAGGGAGAGGAGAACGGCCGCAAGGGGAAGCTT
GCCATCGCCGCAGACATCTTCGCCGTGACGCCGTCGTTCCTGGTCGTGGAGGTCAAGAAG
TCGAGTGGCGACACCCTAGAGTACAACAAGTTCTGCAGCGAGGAGCTTCGGCCGGCGCTC
AAAGACATCGTGTGGACTTCGACGGTGACGCAGAATTCTACGCCGGCTTGA
>AvCIPK33 | Symbols: R_transcript_66275
ATGAGTAAGCCAAAAATTAAGCGTCGAGTGGGTATTTATGAAGTGGGACGGACAATAGGT
GAGGGTACATTTGCAAAAGTAAAATTTGCAAAGAATTCTGAGACTGGGGAAGCAGTTGCT
CTCAAGATTCTTGACAAGGAGAAAGTTCTTAAACACAAAATGGCTGAACAGATAAAGCGG
GAAGTAGCGACAATGAAATTGATAAAGCATCCAAATGTTGTTTGCTTATATGAGGTAATG
GGGAGCAAGACCAAGATATTTATTGTTTTGGAGTTTGTAACTGGGGGAGAACTCTTTGAC
AAAATTGTAAACCAAGGGCGAATGAAAGAAGACGAAGCACGGAGGTATTTTCAGCAGCTT
ATCAATGCTGTTGATTATTGTCATAGCAGGGGTGTCTACCACAGAGACCTGAAGCCAGAA
AATTTGCTCTTGGATGCATGTGGAAAACTGAAAGTTTCTGATTTTGGATTAAGTGCTCTG
TCCCAGCAAGTCAGGGATGACGGTCTGCTTCATACTACATGTGGAACACCAAACTATGTT
GCTCCTGAGGTCCTCAATGATCGAGGCTATGATGGAGCAACTGCTGACTTGTGGTCATGT
GGGGTCATACTCTTTGTATTGCTTGCAGGTTACTTGCCTTTTGATGATTCTAATCTTATG
AACCTGTATAAAAAAATTTCTGCCGCTGAATTTACTTGCCCCCCTTGGCTGTCTTTTGGT
GCCATGAAATTGATCACTCGAATCTTGGATCCCAACCCTATGACTCGCATCACTATACCC
GAAATTCTAGTAGATGAATGGTTTAAAAAAGGTTATAAGCCTCCAGTTTTTGAGGAGAAG
GAAGATACAAACTTGGATGATGTCGAAGCTGTTTTTAGGGACTCGGAAGAACATCATGTG
ACAGAGAAGAAGGAAGAGCAGCCAACAGCCATGAACGCATTTGAGTTAATTTCTATGTCC
AAAGGGCTCAATCTTGGGAATTTGTTTGATGTAGAGCAGGAATTTAAGAGGGAAACGAGG
TTCACGTCTAAGTGTCCAGCTAATGAGATAGTCAGCAAGATCGAAGAAGCTGCAAAACCT
CTTGGTTTTGATGTTCACAAGAAAAATTACAAGCTGAGGCTTGAAAATGTGAAAGCTGGG
AGAAAAGGAAATCTTAATGTCGCTACCGAGGTCTTTCAAGTGGCACCCTCTCTTCATATG
GTGGAGGTGCGAAAAGCAAAAGGAGACACTTTGGAATTCCATAAGTTCTATAAGAATCTC
TCAACCAGCCTCGAGGACGTGGTTTGGAAAACTGAGGAGGACATGCAAGAACTGAAGTGA
>AvCIPK34 | Symbols: R_transcript_70579
ATGGTGGTGGTGAGGAAGGTAGGGAAGTACGAAGTGGGGAGGACGATCGGAGAAGGAACC
TTCGCGAAGGTGAAGTTCGCTCAGAACACGGAGACTGGTGAGAGTGTCGCCATGAAAGTT
CTGGATCGCACCACCATCCTCAAGCACAAGATGGTCGATCAGATTAAGAGGGAGATATCT
ATAATGAAGCTTGTCAGACATCCAAATGTTGTTCGTCTGCACGAGGTTCTGGCGAGTCGC
ACGAAGATCTATATAATCTTGGAATTTATTACAGGTGGCGAATTATTTGATAAAATAGTT
CACCATGGAAGACTCAGTGAAGCTGACTCGAGGAGATTCTTCCAACAACTCATTGATGGT
GTGGATTATTGCCATAGCAAGGGAGTCTACCACAGAGATCTGAAGCCTGAAAATCTTTTA
CTGGATTCTGAAGGAAGTCTCAAAATTTCAGATTTTGGGCTTAGTGCCTTGCCTGGAGAA
GGAGTCAGCCTCCTTCGAACGACTTGCGGGACTCCTAACTATGTTGCACCTGAGGTACTC
GGTCACAAGGGCTATGATGGTGCTGTTGCTGATGTTTGGTCCTGTGGGGTCATTCTATAT
GTTCTGATGGCAGGATATCTTCCATTTGATGAAATTGATCTCACCACATTGTATAGTAAG
ATAGACAAAGCAGAGTTTTCGTGTCCGTCATGGTTTCCAGTAGGAGCAAAATCTTTAATT
CATCGAATTTTAGATCCAAATCCTGAAACTCGTATTCGGATTGAAGAGATAAGGAGTGAT
GAGTGGTTTAAGAGGAGTTATGTTCCTGTCAAACTTATTGAATATGAAGATGTTAACCTG
GATGATGTTAATGCTGTTTTTGACGATCCCGAGGAAGAACAGGTTGATGAGAAGGGCAGG
AATGAGCATTTGGGTCCTCTGACTCTTAATGCATTCGATCTAATTATTCTCTCTGAAGGT
CTAAACCTTTCGTCACTGTTTGATCGTCGGCAGGACTCTGCGAATCATCAAACACGCTTT
GTTTGTCAGAAACCAGCACAGGTGGTTTTATCAACAATGGAAGTTGTTGCACAATCAATG
GGTTTTAAGACCCATATACGTAATTATAAGATGAGAGTGGAAGGCCTTTCAGCAAACAAG
ACATCGCATTTCTCGGTCATTTTGGAAGTATTTGAAGTTGCTCCTACATTCCTGATGGTC
GACATGCAGAAAGCAGCTGGAGATGCTGGTGAATACCTCAAGTTTTACAAGAATTTTTGT
GACAATCTTGAGGATATCATCTGGAGGCCGTCCAACGAACCGTGCAAATCAAGGGTTACC
AAGACTAAGAGCAAAAGGCGATAA
>AvCIPK35 | Symbols: R_transcript_70788
ATGCAAGAGATCGAACATGCCACCACCGCATCACTGCTGGAGACAGTAGCCTCAACATCG
GCAACGAAAATGAACAACAACGCCTTATTCGGCAAGTATGAACTCGGAAGGCTCCTCGGA
TGCGGAGCCTTCGCCAAGGTCTACCACGCCAGAAACATCGCCACCGGCCAGAGCGTCGCC
GTCAAGGTCATCAGCAAGAACAAAATCGCCGGGACGAACTTAATGTCTAATGTCAAGCGC
GAGATCGCTATCATGCGCCGGTTGCGCCACCCGCACATCGTGAAGCTCTTCGAGGTCCTG
GCCACCAAGACCAAGATCTACTTCGTGATGGAGTTCGTCAAGGGCGGCGAGCTCTTCGTA
AAGGTCGCCAAGGGCCGGTTCTCAGAGGATCTCAGCCGCAAGTACTTCCACCAATTGATC
TCCGCCGTCGGGTACTGCCACTCCCGCGGCGTCTTCCATCGAGATCTGAAGCCGGAAAAC
CTCCTACTCGACGAGAACGGCGATCTGAAGGTCTCCGATTTCGGACTCAGCGCCGTCAAC
GATCAGATCCGGCTCGACGGTTTGTTACACACGCTGTGCGGCACGCCTGCCTACGTGGCG
CCAGAGATTCTCGCGAAAAAAGGATACGATGGTGCGAAGGTGGATGTGTGGTCATGCGGA
GTCATCCTCTTCGTGCTAACGGCAGGATATCTACCATTCAACGACCCCAACCTCATGATG
ATGTACAAGAAGATCTACAAAGGAGAGTTCCGTTGCCCCAAATGGATGTCGTCAGATCTC
AGACGGTTCCTCTCACGCCTCCTTGACACGAACCCCGAGACGAGGATCACCGTCGATGAG
ATCGTACGGCACCCGTGGTTCAAGAAAGATTGCAAGGAAATCAACTTCTATTATGAGGAA
GCATTTGACAAGGCCGAGAAAGAAGAGAAAAACGGTTTGGCTCTGAACGCGTTCGATTTG
ATATCGTTCTCGCCCGGGTTGAATCTGTCCGGTTTGTTCGACGACTCGGCCAACTCGTCC
GGCCACGGTGAGAGGTTCTTGTCGGCGGATTCACCGGAGAGAATTATCCAGAAGGTTGAA
GAGGTCGTGAAGGGTGAGAGGGTTGTGAGGTTGAGGAAGAAGAAGGAATGGGGAATCGAA
TTGGAAGGGTTTCATGGTAATTTCGTTCTCGGACTGGAGATTTACCGGTTGACCGACAGT
TTGGTAGTTGTGGAGGCTTCGCGGAAAGGTAGTAGTGCCGATTTATTCAACGACGTGTGG
AAGAATAAAATCAAGCCGGCGCTCATTTCCTCACCCGAAGCGCCGGTTCCCGGTGTCTAA
>AvCIPK36 | Symbols: R_transcript_73416
ATGGGGTATGTGCATACCATTGGAAAGTACCAACTCGGTCGAACGATTGGAGAAGGTACT
TTCGCAAAGGTTAAGTTAGCCGCAAACACAGAAGATGGCCACTATGTGGCAATCAAGGTC
ATCGATAAGCACATGGTCATTGAAAACAATCTCATGCACCAGGTGCAGAGAGAAATAAGC
ACAATGAAGCTTTTGCATCACCCAAACATTACAAGGATACACGAGGTGATTGGCACGAAA
ACAAAAATTTACATAATAATGGAGTACGTATCGGGAGGAGTGTTATCCGACATGATGTCG
TATGTCAATAGGTTGAGTGAAAGAGAGGCGAGGAAGCACTTTCAGCAGTTAATCGATGCT
GTAGATTACTGCCATTGCAGAGGGGTTTACCACAGAGATCTAAAGCCACAAAACTTGCTT
TTGGATAGCAAAGGAAATCTCAAAGTATCAGATTTTGGCCTCAGCGCCTTGAGAAAGCAC
GGACTGCTATCGACAGCGTGTGGATCTCCAAGCTATGTAGCACCAGAGCTGCTTACAAAC
AAGGGCTACGAGGGAGCGGCTGCAGATGTTTGGTCCTGTGGAGTACTCCTTTTTGAATTG
CTCGCCGGTTATCTACCATTTGATGACCGTAACCTGATGAACTTGTATAGGAAGATCTTG
AGAGCAGAATACAAATTTCCAGATTGGTTCACAGAAAGCCAAAAGAAACTGATCTCCAGG
ATATTTGATCCGAATCCCCAAAAGCGAATAAAAATACCAGATATTATCGATGATGAGTGG
TTTCAAACTAATTATGAGCCAGCTGTGCGAATTGAATGTGGTGAAGACATAAACTTTGAT
GATGTTCATGCAGCTTTCAATTCAGTTAAGGAAAATGTGACTGAGAAAAAAATACCCCAT
ACTCCAAGTTTCATAAATGCTTTTCAGCTAATAGCCATGTCCCATGACCTTGATTTGTCA
GGACTATTTGAAGAACAGGATAATGAGAAGCAAAAAACAACGCTTGGATCAAAGCATACG
ATCAATGAAACCATAGAGAAAATTGAGGCTGCTGCGAAGGATGTGAGTCTCTCTGTTGAA
AGGATGAACAAATCAAAGGTGAAAATTCATCCAAATCAGAAGATGACTAGATGTTCAAGG
TCATGCTTTAATCTATCAGCAGAGGTAATTGAGGTAGCACCAACACATTGTGTTGTTGAA
ATATCAAAATCTGTAGGGGAGCTAGAACCGTACAGAGAGTTTTGCAAAAGCTTATCAAGT
ATGCTGTCAGAAGAATCAGGTGTGCCATTTGAAACACAATCACCTAAGGCAGGCACCGCC
AGCAGTAAAAGTATCCAACAAAATGAAAGCATTGTACAGAATGATGACAAGGACCCTAAA
GACCTGCGAGGCTATTCTTCCTCTTGA
>AvCIPK37 | Symbols: R_transcript_78088
ATGGCCGACCATAAGGGTAGCGAGAAATCACAACCCCACTGCGTACTCCATGGGAAGTAC
GAGCTGGGGCGGTTGTTGGGCCACGGCACGTTCGCGAAGGTGTACCACGCGCGGCACCTG
GTGACGGGGAAGAGCGTGGCGATGAAGGTGGTCGGAAAGGAGAAGGTCATGAAGGTCGGC
ATGACGGAGCAGGTGAAGAGAGAGATCTCGGTGATGAAGATGGTGCAGCACCCGAATATC
GTCGAGCTTCATGAAGTTATGGCTAGCAAGACGAAGATCTACTTCGCGATGGAGCTCGTG
CGCGGCGGCGAGCTGTTCTCGAAGGTCGCCATGGGGCGGCTGCGGGAGGACGCCGCCAGG
AACTACTTCCAGCAACTCATCTCCGCTGTCGATTTCTGCCACAGCCGCGGCGTCTACCAC
CGTGACCTCAAGCCGGAAAACCTCCTCCTCGACGACGACGGTAACCTGAAAGTGACCGAT
TTCGGTCTCTCGGCGTTTGCCGACCACCTGAGGCAGGACGGGCTCCTCCACACAACCTGC
GGGACGCCGGCGTACGTGGCGCCGGAGGTGATCGGAAAAAAGGGCTACGACGGCGCTAAG
GCGGACATTTGGTCTTGCGGTGTTATTCTCTATGTGTTGTTAGCTGGATTTTTACCGTTT
CAGGACGATAACATTGTGTCTCTGTACCGGAAAATTTACCGGGGCGACTTCAAGTGTCCA
CCGTGGTTCTCGCCGGAGTCGAGGCGGTTGATAACGAAATTGCTGGATCCAAATCCGAGC
ACTCGCATCACCGCCGCGAAGATCATGGAGTCTTCCTTCTTCAGGAAGACGATTCCGAGA
TCTGTGAGCAGAGCCAAAGACGAGGAAAGTGTGATTATGGAAGAGAAGCCGAAAACCGAG
ACTCTGAACGCGTTCCACATCATCTCTTTGTCAGAGGGGTTCGATCTGTCGCCGCTCTTC
AAGGAGAAGAGGAGGGAGGAGAAGGAGGAGCTGAGGTTCGCGACGGCCGGGCCGGCGAGC
AGCGTGATATCGCGGCTGGAGGAAGTGGCGGCGAGGGCGGCGGGGAAGTTCAGCGTGAGG
AGGAGCGGCGACACCAGCGTGCGGCTTCAGGGCGAGGAGAACGGCCGCAAGGGGAAGCTT
GCCATCGCGGCAGACATCTTCGCCTTGACGCCGTCGTTCCTGGTCGTGGAGGTCAAGAAG
TCGAGTGGCGACACCCTAGAGTACAACCAGTTCTGCAGCGAGGAGCTTCGGCCGGCGCTC
AAAGACATCGTGTGGACTTCGACAGTGACGCAGAATTCTACGCCGGCTTGA
>AvCIPK38 | Symbols: R_transcript_85358
ATGGCTTCGCGATCGAGTGGGAGTGGGGGGAGGACGAGGGTGGGGAGGTACGAGCTGGGG
CGGACGCTGGGGGAGGGGACGTTTGGGAAAGTGAAATTTGCGAGGAATGTAGAGAGTGAA
GAGATTGTGGCTATTAAGATTCTCGACAAAGAGAAGATTCTCAAGCACAAGATGATCAGT
CAGGTTATGGCTAGCAAGACAAAAATATACATTGTTTTGGAATTTGTGACTGGGGGTGAA
CTCTTTGACAAAATTGTTACTAAAGGGAGATTGAAAGAAGACGAAGCAAGGAAGTATTTT
CAGCAGCTCATAAATGCGGTGGATTACTGCCACAGTAGAGGTGTTTTCCATAGAGACCTG
AAGCCAGAGAATCTGCTGCTGGATGCAAATGGAGTCCTTAAAGTTTCGGATTTTGGATTA
AGTGCTCTACCTCAGCAAGTTCGAGAAGATGGGCTTCTACACACAACCTGTGGAACACCA
AATTATGTTGCTCCTGAGGTGATCAACAATAAAGGCTACGATGGAGCTAAGGCAGACCTG
TGGTCTTGCGGTGTAATCCTTTTTGTCCTTGTGGCAGGATATCTACCTTTTGAAGAGTCC
AACCTTATGGCATTATACAAAAAGATATTCAAGGCTGACTTCACATGTCCTTCATGGCTT
TCCTCGAGCGCGAAGAAACTAATCAAAAGGATCCTAGATCCTAGTCCCATGACGCGCATC
ACGATTGCAGAGCTCATTGAGAATGAGTGGTTTAAGAAGGGATACAAGCCGCCCACTTTT
GAGCAGGCAGATGTTAGTCTCGACGATGTAGATGGTATTTTTGATGAATCAGGGGACACT
CATAACCTTGTTGTGGAAAGGCGGGAAGAACGAGCCACCCCTGTCTCTATGAACGCTTTT
GAGCTTATCTCTAAATCTCAGGGTCTAAACCTCAGTTCTCTATTTGAAAAGCAAATGGGG
CTTGTTAAACGGGAAACAAGATTTACATCTAAATGCCCTGCCAAAGAGATTATCTCAAAA
ATCGAGGAAGCTGCTGCGCCTTTGGGATTTGATGTGAAGAAATACAATTATAAGCTGAAG
CTTCAAGGGGAGAAAACTGGTCGCAAGGGTCATTTATCTGTTGCAACAGAGGTGTTTGAG
GTGGCTCCCTCACTTTGTATGGTTGAGCTTCGCAAGGCTGGTGGGGATACCTTGGAATTT
CACAAGTTCTACAAAAACCTGGCGACTGGTTTGAAAGATATTGTCTGGAAATCAGTTGAT
GAAACAAAAGAGGAAGCAAATGATGGTGTTGGTATTGTCTCCTCTTAA
>AvCIPK39 | Symbols: R_transcript_88112
ATGGCTATGGAACGGCCCGCCCCACCGCGTTCCTCCGCCGCAACCACCACCACGACCAAC
AATGGAATCATATTGGGCAAGTACCGATTGGGCCGGCTTTTGGGCCGGGGCAGCTTCGCC
AAGGTCTACCAGGCCCAATCTCTAAGCAACGACACGACGGTGGCTATTAAGGTGATCGAC
AAGGCCAAGACGGTGGACGCCTCTATGGAGCCTCGGATCGTGCGCGAAATCGCCGCCATG
CGCCGCCTCAGCCACCACTCCAACATCCTCCAAATCCATGAGGTCATGGCCACAAAAACC
AAGATCTACCTCGTCATGGATCTCGCCGCAGGCGGTGACCTCTCCAGCGCCCTCGCCCGC
CGACGCCGCCGACACCTTCCTGAATCCGCCGCTCGCCGCTACTTTCAGCAGCTCGTCTCC
GCCCTCCACTTCTGCCACCGCCAAGGCGTCGCCCACCGCGACATCAAGCCCCAGAACCTC
CTCCTCGATTCCGCCGGAACCCTAAAGATCTCTGACTTCGGCCTCGCCGCCCTGCCGGAA
AACCGCGAGAACCTCCTCCACACCGCCTGCGGGACCCCGGCGTTCGCCGCCCCTGAGGTG
GTCCGACGCGGCGGTGGCTACGACGGCGCGAAGGCAGACGCCTGGTCGTGCGGCGTCATT
CTCTTCCTCTTCCTCGCCGGAAACCTCCCCTTCGACGATTCCAACCTCGCCTCCATGTTC
CAGAAGATTTGCCGCCGCGAATTTCAATTCCCCGATTGGATCTCGAAGCAATCGAAATTC
ATCATCTATCGTTTATTAGATCCAAATCCCAATTCGAGGATGACTTTAGAGACCTTAATC
GATCACTCTTGGTTCAAGAAATCATTGCAATTAGACCCCTCTGCGCAAAATCCACCTCCC
CAATTCAGCAAACTCCAAGCCCAAGCGAAGAGACAGACTATGAACGCGTTTGATATAATT
TCGATGTCATCGGGGTTGGATTTATCGGGGCTTTTCGAGCCCAGCTCGACTCGTGAGAGA
GAGAGGAGGTTTACGGCGAAGGCAACGGAGGCGGCGGTTGAGGAGAGAGTTGGGGAGGTG
GGAGAGAGATTGGGGTACAGAGTAGATCGAGAGAAGGATAGGAAGAGTGTTGGGTTGTTG
AAGGGAAGGGTCGTTTTGGAATTTGAGATTATGGTGGTGGCGGAGGGGTTGGTGATGGTG
GTGGTGACGGTGGGTGGTGGTGGCTTTGAGGAGGTTAATTGGGATGATTTGAGAGTAGGT
TTTGGGGACATAGCTCTTGATTGGCATAATGAGGGGTCTTGA
>AvCIPK40 | Symbols: R_transcript_89489
ATGGAGAAATTCACAAGTGTCAGGATCTGTAATTATAAGAGAATTTCCACCTGTAAATCA
AATATGAGTCAGCCAAAAATTAAGCGTCGAGTCGGTATATATGACGTGGGAAGGACAATA
GGCGAGGGTACGTTTGCAAAAGTGAAATTTGCAAGGAATTCCGAGACTGGGGAATCAGTT
GCTCTCAAGATTCTTGACAAGGAGAAAGTTCTTAAACACAAAATGGCCGAACAGATAAAG
CGGGAAGTAGCGACAATGAAGTTGATAAAGCATCCAAATGTTGTTCGCTTATACGAGGTA
ATGGGGAGCAAGACCAAGATATTTATTGTTTTGGAGTTTGTAAATGGGGGAGAATTGTTT
GACAAAATTGTAAACCATGGGCGAATGAGAGAAGATGAAGCACGGAGGTATTTTCAGCAG
CTTATCAATGCTGTTGATTATTGTCATAGCAGGGGAGTCTATCACAGGGATCTGAAGCCA
GAAAATTTGCTCTTGGATGCCTATGGAAACCTTAAAGTTTCTGATTTTGGATTAAGTGCT
CTGTCCCAGCAAGTCAGGGATGATGGGTTGCTTCATACTACATGCGGAACACCAAACTAT
GTCGCTCCTGAGGTCCTCAATGACCGAGGCTATGATGGGGCAACTGCAGACTTGTGGTCC
TGTGGGGTCATACTCTTTGTATTGCTTGCAGGTTACTTGCCTTTTGATGATTCTAATCTT
ATGAACCTGTATAAAAAAATTTCAGCCGCTGAGTTTACTTGCCCCCCCTGGCTCTCTTTT
GGGGCCATGAAATTGATCGCTCAAATCTTGGATCCCAACCCTATGACTCGCATCACTATA
CCCGAACTTCTGGTAGATGAATGGTTTAAAAAAGGTTATAAGCCACCGGTTTTTGAGGAG
AAGGAAGATACAAATTTGGATGATGTCGAAGCTGTTTTTAGGGACTCGGAAGAACATCAC
GTGACAGAGAAGAAGGAAGAACAGCCGGTGGCCATGAACGCATTCGAGTTAATTTCTATG
TCCAAAGGGCTCAACCTTGGGAATTTGTTTGATGTAGAGCAGGGATTTAAGAGGGAAACG
AGGTTCACGTCTAAATGTCCAGCTAACGAGATAGTCAGCAAGATTGAAGAAGCTGCTAAA
CCTCTTGGTTTTGATGTTCACAAGAAAAACTACAAGCTGAGACTTGAAAATGTGAAAGCT
GGGAGAAAAGGAAACCTTAACATTGCTACTGAGGTATTCCAAGTGGCACCCTCTCTTCAT
ATGGTTGAGGTGCGAAAAGCAAAAGGTGACACTTTGGAATTCCACAAGTTCTATAAGAAT
CTTTCAACCTGCCTCGAGGACGTGGTTTGGAAAACAGAGGAGGACATGCAAGAAATGAAG
TGA
>AvCIPK41 | Symbols: R_transcript_96602
GGAGTGGGTGGGAAAGAGGGGGAGGAGAGGAACAAGGGAATGCGACTGGGGAAGTATGAG
ATCGGAAGAACGCTTGGGGAAGGCAATTTCGGGAAGGTGAAATTCGCTAAGAACCTTGAA
TCGGGCCAATCTTTCGCCGTCAAAATCCTCGAGAAGACCCGAATTCTGGACCTCAACATC
ACCGATCAGATCAAGAGGGAGATTGGGACGTTGAAGCTTCTCAAACATCCCAACGTGGTC
CGGTTACATGAGGTACTGGCAAGCAAAACCAAGATCTACATGGTCCTTGAATGTGTGACA
GGGGGTGAATTGTTTGACAGAATTGCCTCCAAGGGTAGACTCTCAGAGGCTCAAGGAAGA
AAGCTCTTCCAACAGTTAATTGACGGGGTTTGCTACTGTCATAACAAAGGCGTTTACCAC
CGCGATCTCAAGCTAGAGAACGTACTTGTTGATGCGAAAGGAAACATAAAGATAACCGAT
TTTGGGCTAAGTGCATTACCCCAACATTTCAGGGACGACGGGTTACTGCATACAACCTGT
GGAAGTCCCAACTACGTTGCTCCTGAGATCCTTGCGAATCGGGGTTATGATGGTGCAACC
TCTGATACCTGGTCTTGTGGTGTCATCTTGTATGTAATTCTCACAGGCTACCTACCATTC
GATGATAGAAATCTTGCTGTTCTATATCAGAAGATTTTCAAGGGAGATGCTCAAATACCA
AAATGGCTAGCCCCAGGAGCCCAAAACCTAATAAGGAGGATTCTTGATCCCAATCCTGCT
ACCCGGATAACTATGGCAGAGATCAAAATAGACGAATGGTTCAAGCAAGGTTATAGTCCT
GCTAATCCTGATGATGAAGAAGAAAGTGTCCACATAGAGGATGAAGGCTTTTGGAGTCAT
GAGTCATCTGAAACAGAGGAAAATCCAGATTCGGCAACACTTATCAATGCGTTTCAGCTG
ATTGGAATGTCCTCGTGTCTAGATCTCTCTGGCTTCTTTGAGAAAGAGGATGTTTCAGAA
AGGAAGATAAGGTTTACTTCCAACCATTCCCCAAAAGAATTGCTCGAAAGGATTGAGGAC
ATTGTAACTCAGATGGGATTTCGGGTCCAGAAGAAAAATGGACAGCTTAAGGCGATGCAA
GAGAACAAAGGCAAAAAGAGCCCAGGAAGCCTTTCAGTTGCAGCAGAAGTGCTAGAGATA
AGTCCATCCTTGTATGTAGTTGAATTAAGAAAATCTTACGGAGATTCTACAGTTTATAGA
CAGTTGTGTAATAAGTTATCAAATGATCTGGGTAATGATCTCAGTGTCTCACCAGGTCAA
GGGCGGCTGATGGCGATGGATGTTTGA
>AvCIPK42 | Symbols: R_transcript_9920
ATGTCTTCTCGATCGGGTGGGAGTGGGATTGGGGGTGGGGGGAGGACGAGGGTGGGGAGG
TACGAGCTGGGGCGGACGCTGGGGGAGGGGACGTTTGCGAAAGTGAAATTTGCGAGGAAT
GTAGAGAGTGAAGAGAATGTGGCCATTAAGATTCTCGACAAAGAGAAGATTCTCAAGCAC
AAGATGATCAGTCAGATTAAACGTGAAATTTCAACCATGAAACTAATCAGACATCCAAAT
GTTATTCGTATGTTTGAGGTTATGGCTAGCAAGACAAAAATATACATTGTTTTGGAATTT
GTGACTGGGGGTGAACTCTTTGACAAAATTGCTAGTAAAGGGAGATTGAAAGAAGACGAA
GCAAGGAGGTACTTTCAGCAGCTCATAAATGCGGTGGATTACTGCCACAGCAGAGGCGTT
TTCCATAGAGACCTGAAGCCAGAGAATCTGCTGCTGGATGCAAATGGAGTCCTTAAAGTT
TCAGATTTTGGATTAAGTGCTCTACCTCAGCAAGTTCGAGAAGATGGGCTTCTACACACA
ACCTGTGGAACACCAAATTATGTTGCTCCTGAGGTGATCAACAATAAAGGCTATGATGGA
GCTAAGGCAGACCTGTGGTCTTGCGGTGTAATCCTTTTTGTCCTTATGGCAGGCTATCTA
CCTTTTGAAGAGTCCAATCTCATGGCATTATACAAAAAGATTTTCAAGGCTGACTTCACA
TGTCCTTCATGGTTTTCCTCAAGCGCAAAGAAACTAATCAAAAGGATCCTGGATCCTAAT
CCCATGACACGCATTACGATTGCAGAGCTCATTGAGAATGAGTGGTTTAAGAAGGGATAC
AAGCCACCCACTTTTGAACAGGCAGATGTTAGTCTCGACGATGTGGATGCTATTTTTGAT
GAATCAGGGGACACTCAAAACCTTGTCGTGGAAAGGCGGGAAGAACGAGCCACCGCTGTC
TTTATGAACGCTTTTGAGCTTATCTCTAAATCTGAGGGTCTAAACCTCAGTTCTCTATTT
GAAAAGCAAATGGGGCTTGTTAAACGGGAAACAAGATTTACATCTAAATGTCCTGCCAAT
GAGATTATCTCAAAAATCAAGGAAGCCGCAGCACCTTTGGGATTTGATGTGAAGAAAAAC
AATCATAAGCTGAAGCTTCAAGGGGAGAAAACTGGTCGCAAGGGTCATTTATCTGTTGCA
ACAGAGGTTTTTGAGGTGGCTCCCTCACTTTGTATGGTTGAGCTTCGCAAGGCCGGTGGG
GATACCTTGGAATTTCACAAGGTATGGTTCTAA

## Sheet: Table S3
The functional annation analysis of highly expressed genes in the different database
Rename	Gene ID	COG_class_annotation	GO_annotation	KEGG_annotation	KOG_class	KOG_class_annotation	Pfam_annotation	Swissprot_annotation	eggNOG_class	eggNOG_class_annotation	nr_annotation
AvCIPK6	R_transcript_14995	Signal transduction mechanisms	Molecular Function: protein serine/threonine kinase activity (GO:0004674);; Molecular Function: ATP binding (GO:0005524);; Biological Process: protein phosphorylation (GO:0006468);; Biological Process: signal transduction (GO:0007165);; Biological Process: response to pH (GO:0009268);;	K12761|0|tcc:TCM_042270|K12761 carbon catabolite-derepressing protein kinase [EC:2.7.11.1] | (RefSeq) SOS3-interacting protein 4	[T]	Signal transduction mechanisms	Protein kinase domain;; Protein tyrosine kinase;; NAF domain;; Kinase-like;; RIO1 family	CBL-interacting serine/threonine-protein kinase 11 GN=At2g30360 OS=Arabidopsis thaliana (Mouse-ear cress) PE=1 SV=1	T	Signal transduction mechanisms	PREDICTED: CBL-interacting serine/threonine-protein kinase 11 [Juglans regia]
AvCIPK11	R_transcript_15669	Signal transduction mechanisms	Molecular Function: protein serine/threonine kinase activity (GO:0004674);; Molecular Function: ATP binding (GO:0005524);; Biological Process: protein phosphorylation (GO:0006468);; Biological Process: signal transduction (GO:0007165);; Biological Process: response to pH (GO:0009268);;	K12761|0|tcc:TCM_042270|K12761 carbon catabolite-derepressing protein kinase [EC:2.7.11.1] | (RefSeq) SOS3-interacting protein 4	[T]	Signal transduction mechanisms	Protein kinase domain;; Protein tyrosine kinase;; NAF domain;; Kinase-like;; RIO1 family	CBL-interacting serine/threonine-protein kinase 11 GN=At2g30360 OS=Arabidopsis thaliana (Mouse-ear cress) PE=1 SV=1	T	Signal transduction mechanisms	PREDICTED: CBL-interacting serine/threonine-protein kinase 11 [Juglans regia]
AvCIPK12	R_transcript_15702	Signal transduction mechanisms	Molecular Function: protein serine/threonine kinase activity (GO:0004674);; Molecular Function: ATP binding (GO:0005524);; Biological Process: protein phosphorylation (GO:0006468);; Biological Process: signal transduction (GO:0007165);; Biological Process: response to pH (GO:0009268);;	K12761|0|tcc:TCM_042270|K12761 carbon catabolite-derepressing protein kinase [EC:2.7.11.1] | (RefSeq) SOS3-interacting protein 4	[T]	Signal transduction mechanisms	Protein kinase domain;; Protein tyrosine kinase;; NAF domain;; Kinase-like	CBL-interacting serine/threonine-protein kinase 11 GN=At2g30360 OS=Arabidopsis thaliana (Mouse-ear cress) PE=1 SV=1	T	Signal transduction mechanisms	LOW QUALITY PROTEIN: CBL-interacting serine/threonine-protein kinase 11 [Herrania umbratica]
AvCIPK16	R_transcript_22835	Signal transduction mechanisms	Molecular Function: nucleotide binding (GO:0000166);; Molecular Function: protein kinase activity (GO:0004672);; Biological Process: phosphorylation (GO:0016310);;	--	[T]	Signal transduction mechanisms	Protein kinase domain;; Protein tyrosine kinase;; NAF domain;; Kinase-like;; Lipopolysaccharide kinase (Kdo/WaaP) family	CBL-interacting serine/threonine-protein kinase 7 GN=At3g23000 OS=Arabidopsis thaliana (Mouse-ear cress) PE=1 SV=1	T	Signal transduction mechanisms	CBL-interacting serine/threonine-protein kinase 7-like [Herrania umbratica]
AvCIPK35	R_transcript_70788	Signal transduction mechanisms	Molecular Function: protein serine/threonine kinase activity (GO:0004674);; Molecular Function: ATP binding (GO:0005524);; Biological Process: protein phosphorylation (GO:0006468);; Biological Process: signal transduction (GO:0007165);; Biological Process: response to pH (GO:0009268);;	K12761|0|tcc:TCM_042270|K12761 carbon catabolite-derepressing protein kinase [EC:2.7.11.1] | (RefSeq) SOS3-interacting protein 4	[T]	Signal transduction mechanisms	Protein kinase domain;; Protein tyrosine kinase;; NAF domain;; Kinase-like	CBL-interacting serine/threonine-protein kinase 11 GN=At2g30360 OS=Arabidopsis thaliana (Mouse-ear cress) PE=1 SV=1	T	Signal transduction mechanisms	LOW QUALITY PROTEIN: CBL-interacting serine/threonine-protein kinase 11 [Herrania umbratica]

## Sheet: TableS4
All the sequences of pair of primers used in the current study
Assay	Primer sequence		Restriction Site
Gene clon	AvCIPK11(F)	ATGCAAGAGATCGAACATGCC
	AvCIPK11(R)	TTAGCCACAGGGAACCGGA
transformation		gagaacacgggggactctagaATGCAAGAGATCGAACATGCC	XbaI,BamH1
		gcccttgctcaccatggatccGCCACAGGGAACCGGA
transgenetic line detection	35S-30(F)	AACCTCCTCGGATTCCATTGCC
	AvCIPK11(R)	TTAGCCACAGGGAACCGGA
ACTIN	F	TGCATGAGCGATCAAGTTTCAAG
	R	TGTCCCATGTCTGGTTGATGACT
subcelluar localization	pBWAVHS-AvCIPK11-GLosgfp(F)	cagtCACCTGCaaaacaacatgcaagagatcgaacatgccaccac	BsaI,Eco311
	pBWAVHS-AvCIPK11-GLosgfp(R)	cagtCACCTGCaaaatacagccacagggaaccggagc
primers for qRT-PCR in transgen plants
Actinidia40221	AcNHX1（F）	CCACTTCTATCCAACGGGCA
	AcNHX1（R）	GCAACTGATGGACGCTTTGT
Actinidia03168	AcCBL1（F）	ACGGTGAGTGAAGTCGAGG
	AcCBL1（R）	CTCTCGTGCAATGTATCCCGT
AvCIPK11	AvCIPK11(F)	CCACAACATCGGCAACGAAA
	AvCIPK11(R)	GATCTCGCGCTTGACATTCG
